# Supplementary material
Source: PubMed Central journal article supplement (PMC9819649)
Supplement: NIHMS1809640-supplement-1.pdf [file NIHMS1809640-supplement-1.pdf]

# THE LANCET

## Supplementary appendix

This appendix formed part of the original submission and has been peer reviewed. We post it as supplied by the authors.

Supplement to: Pollack A, Karrison T G, Balogh A G, et al. The addition of androgen deprivation therapy and pelvic lymph node treatment to prostate bed salvage radiotherapy (NRG Oncology/RTOG 0534 SPPORT): an international, multicentre, randomised phase 3 trial. *Lancet* 2022; **399**: 1886–1901.

**APPENDIX: The addition of androgen deprivation therapy and pelvic lymph node treatment to prostate bed salvage radiotherapy (NRG Oncology/RTOG 0534 SPPORT): an international, multicentre, randomised phase 3 trial, THELANCET-D-20-19617R2**

**Supplementary Tables and Methods**

**Supplementary Table S1: Endpoint Considerations From A Pooled Multi-Institutional Analysis of Patients Treated With Salvage Radiotherapy Only (No ADT; n=533) After Prostatectomy.**

| <b>BECF Definition in mg/mL</b> | <b>% 5/8 yr. Failure</b> | <b>Specificity</b> | <b>Sensitivity</b> | <b>PPV</b> |
|---------------------------------|--------------------------|--------------------|--------------------|------------|
| 1. $\geq 0.2$                   | 59% / 72%                | 56%                | 95%                | 23%        |
| 2. $\geq 0.4$                   | 47% / 64%                | 66%                | 94%                | 27%        |
| 3. $\geq 1.0$                   | 35% / 52%                | 77%                | 92%                | 35%        |
| 4. $\geq 2.0$                   | 29% / 41%                | 84%                | 90%                | 43%        |
| 5. $\geq 0.2+2$ rises           | 42% / 59%                | 72%                | 93%                | 31%        |
| 6. $\geq 0.4+2$ rises           | 39% / 57%                | 74%                | 93%                | 32%        |
| 7. $\geq 1.0+2$ rises           | 32% / 46%                | 80%                | 90%                | 39%        |
| 8. $\geq 2.0+2$ rises           | 29% / 39%                | 85%                | 90%                | 45%        |
| 9. 3 consecutive rises (ASTRO)  | 33% / 36%                | 82%                | 90%                | 40%        |
| 10. Nadir+2 (Phoenix)           | 31% / 40%                | 83%                | 91%                | 43%        |

BECF = biochemical estimator of clinical failure based on PSA parameters after salvage radiotherapy; PPV = positive predictive value

The data used for this analysis is a subset of that reported by Stephenson AJ, Scardino PT, Kattan MW, et al: Predicting the outcome of salvage radiation therapy for recurrent prostate cancer after radical prostatectomy. J Clin Oncol 25:2035-41, 2007

**Supplementary Methods**

*Inclusion and Exclusion Criteria*

Conditions for Patient Eligibility

1. Adenocarcinoma of the prostate treated primarily with radical prostatectomy, pathologically proven to be lymph node negative by pelvic lymphadenectomy (N0) or lymph node status pathologically unknown (undissected pelvic lymph nodes [Nx]), i.e. lymph node dissection is not required;
  - Any type of radical prostatectomy will be permitted, including retropubic, perineal, laparoscopic or robotically assisted. If performed, the number of lymph nodes removed per side of the pelvis and the extent of the pelvic lymph node dissection (obturator vs. extended lymph node dissection) should be noted. There is no time limit for the date of radical prostatectomy.
2. A post-radical prostatectomy entry PSA of  $\geq 0.1$  and  $< 2.0$  ng/mL at least 6 weeks (45 days) after prostatectomy and within 30 days of registration;
3. One of the following pathologic classifications:
  - T3N0/Nx disease with or without a positive prostatectomy surgical margin; or
  - T2N0/Nx disease with or without a positive prostatectomy surgical margin;

4. Prostatectomy Gleason score of 9 or less;
5. Zubrod Performance Status of 0-1;
6. Age  $\geq$  18;
7. No distant metastases, based upon the following minimum diagnostic workup:
  - History/physical examination (including digital rectal exam) within 8 weeks (60 days) prior to registration;
  - A CT scan of the pelvis (with contrast if renal function is acceptable; a noncontrast CT is permitted if the patient is not a candidate for contrast) or MRI of the pelvis within 120 days prior to registration;
  - Bone scan within 120 days prior to registration; if the bone scan is suspicious, a plain x-ray and/or MRI must be obtained to rule out metastasis.
8. Adequate bone marrow function, within 90 days prior to registration, defined as follows:
  - Platelets  $\geq$  100,000 cells/mm<sup>3</sup> based upon CBC;
  - Hemoglobin  $\geq$  10.0 g/dl based upon CBC (Note: The use of transfusion or other intervention to achieve Hgb  $\geq$  10.0 g/dl is recommended).
9. AST or ALT  $<$  2 x the upper limit of normal within 90 days prior to registration;
10. Serum total testosterone must be  $\geq$  40% of the lower limit of normal (LLN) of the assay used (testosterone  $\div$  LLN must be  $\geq$  0.40) within 90 days prior to registration (Note: Patients who have had a unilateral orchiectomy are eligible as long as this requirement is met);
11. Patients must sign a study-specific informed consent prior to study entry.

#### Conditions for Patient Ineligibility

1. A palpable prostatic fossa abnormality/mass suggestive of recurrence, unless shown by biopsy under ultrasound guidance not to contain cancer;
2. N1 patients are ineligible, as are those with pelvic lymph node enlargement  $\geq$  1.5 cm in greatest dimension by CT scan or MRI of the pelvis, unless the enlarged lymph node is sampled and is negative;
3. Androgen deprivation therapy started prior to prostatectomy for  $>$  6 months (180 days) duration. Note: The use of finasteride or dutasteride ( $\pm$ tamsulosin) for longer periods prior to prostatectomy is acceptable;
4. Androgen deprivation therapy started after prostatectomy and prior to registration (Note: The use of finasteride or dutasteride ( $\pm$ tamsulosin) after prostatectomy is not acceptable - must be stopped within 3 months after prostatectomy. Androgen deprivation therapy must be stopped within 3 months after prostatectomy);
5. Neoadjuvant chemotherapy before or after prostatectomy;
6. Prior chemotherapy for any other disease site if given within 5 years prior to registration;
7. Prior cryosurgery or brachytherapy of the prostate; prostatectomy should be the primary treatment and not a salvage procedure;
8. Prior pelvic radiotherapy;
0. Prior invasive malignancy (except non-melanomatous skin cancer) or superficial bladder cancer unless disease free for a minimum of 5 years [for example, carcinoma *in situ* of the oral cavity is permissible];
9. Severe, active co-morbidity, defined as follows:
  - History of inflammatory bowel disease;
  - History of hepatitis B or C; Blood tests are not required to determine if the patient has had hepatitis B or C, unless the patient reports a history of hepatitis.
  - Unstable angina and/or congestive heart failure requiring hospitalization within the last 6 months;
  - Transmural myocardial infarction within the last 6 months;
  - Acute bacterial or fungal infection requiring intravenous antibiotics at the time of registration;
  - Chronic Obstructive Pulmonary Disease exacerbation or other respiratory illness requiring hospitalization or precluding study therapy at the time of registration;
  - Hepatic insufficiency resulting in clinical jaundice and/or coagulation defects; AST or ALT are required; note, however, that laboratory tests for coagulation parameters are not required for entry into this protocol.

- Acquired Immune Deficiency Syndrome (AIDS) based upon current CDC definition; Note, however, that HIV testing is not required for entry into this protocol. The need to exclude patients with AIDS from this protocol is necessary because the treatments involved in this protocol may result in increased toxicity and immunosuppression.
- Prior allergic reaction to the study drug(s) involved in this protocol.

#### Prostatic Fossa Clinical Target Volume (CTVp)

1) Superiorly: The CTVp should extend superiorly to the level of the caudal vas deferens remnant. In some cases, the vas deferens remnant may be difficult to visualize. In the absence of gross disease or seminal vesicle remnants, the superior limit of the CTVp should extend at least 2 cm and need not extend more than 3-4 cm above the level of the pubic symphysis. The consensus definition calls for “inclusion of the seminal vesicle remnants, if present, in the CTVp if there is pathologic evidence of their involvement. However, inclusion of any seminal vesicle remnants seen is recommended.

2) Inferiorly: The CTVp should extend inferiorly to > 8-12 mm inferior to vesicourethral anastomosis (VUA). With axial CT imaging, the VUA can often be seen in the retropubic region as one slice below the most inferior urine-containing image (the bladder must be modestly full). Magnetic resonance (MR) imaging defines this landmark more clearly with the hyperintense urine signal on T2 images. Inferiorly, the border of the CTVp should be at least 8-12 mm below the VUA. A sagittal reconstruction facilitates identification of the position of the VUA and the inferior border of the CTVp below it. If visualization of the VUA is problematic due to image quality or surgical clip artifacts, the inferior limit of the CTVp can extend to a level just above the penile bulb (same border as described above). It should be noted that there was considerable discussion about this definition versus extending the inferior border of the CTVp to just above the penile bulb; both definitions were deemed acceptable.

3) Anteriorly: Below the superior border of the pubic symphysis, the anterior border is at the posterior aspect of the pubis. The CTVp extends posteriorly to the rectum where it may be concave at the level of the VUA. At this level the lateral border extends to the levator ani. Above the pubic symphysis the anterior border should encompass the posterior 1-2 cm of the bladder wall at the minimum and posteriorly it is bounded by the mesorectal fascia. At this level the lateral border is the sacrorectogenitopubic fascia. This is not well-defined in textbooks. If in question, the lateral border should extend to the obturator internus muscle.

4) Posteriorly: The CTVp extends posteriorly to the anterior rectal wall, but may be somewhat concave around the anterior-lateral aspect of the rectum to adequately encompass the prostate bed.

#### Planning Target Volumes (PTVs)

##### PTVp (prostate bed PTV)

The PTVp margins around the prostate bed Clinical Target Volume (CTVp) were defined to be a minimum of 0.8 cm and a maximum of 1.5 cm in all dimensions. A reduction of the PTVp margin from 0.8 cm to  $\geq 0.6$  cm to minimize rectal exposure was considered a variation acceptable. A posterior margin of  $< 0.6$  cm was considered an unacceptable deviation. A margin for penumbra for 3D-CRT, usually 0.5–0.7 cm beyond the PTVp was added such that  $\geq 95\%$  of the PTVp received the prescribed dose (64.8-70.2 Gy); an acceptable variation was considered if  $< 95\%$  to 90% of the PTVp received the prescribed dose, and an unacceptable deviation was noted if  $< 90\%$  of the PTVp received the prescribed dose. At least 95% of the PTVp should have received the prescribed dose (64.8-70.2 Gy); a variation acceptable was noted if  $< 95\%$  to 90% of the PTVp received the prescribed dose, and a deviation unacceptable was noted if  $< 90\%$  of the PTVp received the prescribed dose. The planned dose, between 64.8 to 70.2, was declared after the patient was planned and all dosimetric parameters finalized.

### PTVn (pelvic lymph node PTV)

The PTVn margin around the CTVn was the same as that described for the PTVp. The PTVn was to receive 45 Gy at 1.8 Gy per fraction during the first 25 fractions, along with the PTVp. A composite plan should be generated showing that at least 95% of the PTVn and PTVp receive the prescribed dose; a variation acceptable will be noted if < 95% to 90% of the PTV(s) receives the prescribed dose, and a deviation unacceptable will be noted if < 90% of the PTV(s) receives the prescribed dose.

### Interim Analyses

A group sequential test with three planned interim analyses was specified. The interim analyses were to be carried out when cumulative accrual and follow-up targets (enrolled patients whose follow-up was at least 5 years from the randomization date) were met (Supplementary Table S2). At each planned interim analysis, the p-value from Z-test statistics for the difference between the five-year FFP rates assessing treatment efficacy or futility were compared to the nominal significance level. The nominal significance level of 0.001 (one-sided), which is similar to the Haybittle-Peto test (Peto et al., 1976), was chosen for efficacy testing. For the futility testing boundary, Rule C in Freidlin and Korn (2002) was used.

For efficacy testing, the following procedure was specified. Arm 3 is first compared with Arm 2 and the arm that has the higher observed FFP rate is chosen. Let  $p_1$ ,  $p_2$ , and  $p_3$  equal the observed rate of 5-year FFP in Arm 1, Arm 2 and Arm 3, respectively.

- 1) If Arm 2 is better than Arm 3 ( $p_2 \geq p_3$ ), Arm 2 is compared with Arm 1. The following hypothesis is tested:

$$H_{01}: p_2 \leq p_1 \text{ vs. } H_{A1}: p_2 > p_1.$$

If  $H_{01}$  is rejected ( $p \leq 0.001$ ), then we would conclude that the 5-year FFP of Arm 2 is better than Arm 1. We report that Arm 2 is better than arm 1 and stop accrual to arm 1 if applicable. If  $H_{01}$  is not rejected ( $p\text{-value} > 0.001$ ), then we continue the trial and proceed to the next interim analysis without any results reporting. With respect to interim evaluation of Arm 2 vs. Arm 3, if  $H_{01}$  is rejected, the following hypothesis is tested:

$$H_{02}: p_2 \leq p_3 \text{ vs. } H_{A2}: p_2 > p_3.$$

If  $H_{02}$  is rejected ( $p\text{-value} < 0.001$ ), then Arm 2 is declared best and the complete trial results (superior arm identified) are reported. If  $H_{02}$  is not rejected ( $p\text{-value} > 0.001$ ), then we continue the trial to the next interim analysis to evaluate Arm 2 vs. Arm 3.

- 2) If Arm 3 is better than Arm 2 ( $p_2 < p_3$ ), then we compare Arm 3 with Arm 1. The following hypothesis is tested:

$$H_{03}: p_3 \leq p_1 \text{ vs. } H_{A3}: p_3 > p_1.$$

If  $H_{03}$  is rejected ( $p\text{-value} \leq 0.001$ ), then we conclude that the 5-year FFP of Arm 3 is better than Arm 1. We report that Arm 3 is better than arm 1 and stop accrual to arm 1 if applicable. If  $H_{03}$  is not rejected ( $p\text{-value} > 0.001$ ), then we continue the trial and proceed to the next interim analysis without any results reporting. With respect to interim evaluation of Arm 2 vs. Arm 3, if  $H_{03}$  is rejected, then the following hypothesis is tested.

$$H_{04}: p_3 \leq p_2 \text{ vs. } H_{A4}: p_3 > p_2.$$

If  $H_{04}$  is rejected ( $p\text{-value} < 0.001$ ), then Arm 3 is declared best and the complete trial results (superior arm identified) are reported. If  $H_{04}$  is not rejected ( $p\text{-value} > 0.001$ ), then we continue the trial to the next interim analysis to evaluate Arm 2 vs. Arm 3.

For futility testing, we compare Arm 3 vs. Arm 1 and Arm 2 vs. Arm 1 if applicable. The following hypotheses are tested:

$$H_{05}: p_1 \geq p_2 \text{ vs. } H_{A5}: p_1 < p_2 \text{ and } H_{06}: p_1 \geq p_3 \text{ vs. } H_{A6}: p_1 < p_3.$$

The alternative hypotheses,  $H_{A5}$  ( $p_2 = p_1 + 0.1$ ) and  $H_{A6}$  ( $p_3 = p_1 + 0.1$ ) will be tested at the 0.001 level (the futility nominal significance level). If the computed p-value is less than 0.001 then we consider stopping the trial in favor of  $H_{05}$  or  $H_{06}$  and report the results.

As described in the main text, the Arm 3 vs. Arm 1 efficacy boundary was crossed at the third interim analysis, and the DMC recommended reporting the full results of the trial.

**Supplementary Table S2. Schedule for the Planned Interim Analysis**

| <b>Information Time</b> | <b>Estimated Analysis Time*</b> | <b>Cumulative Accrual in the Three Arms**</b> |
|-------------------------|---------------------------------|-----------------------------------------------|
| 0.25                    | 7 years                         | 397                                           |
| 0.50                    | 9 years                         | 794                                           |
| 0.75                    | 11 years                        | 1191                                          |
| 1.0                     | 13 years                        | 1587                                          |

\* Time to the interim analysis from the first patient entry

\*\*The number of eligible patients whose follow-up is at least 5 years from the randomization date

#### Secondary Endpoints and Post-Hoc Analyses

Secondary endpoints included local failure, regional failure, distant metastases, biochemical failure using an alternative definition (PSA  $\geq$  0.4 and a second rise above nadir or start of second salvage therapy), castrate resistant disease (three rises in PSA after the start of second salvage hormone therapy), prostate cancer cause-specific mortality, overall survival, and quality of life, and toxicity. Two post-hoc endpoints were also evaluated, namely, metastasis-free survival and time to initiation of ADT salvage therapy. While cumulative incidence curves are presented for the secondary endpoints (with the exception of overall survival), they were analyzed in terms of the cause-specific hazard rate (Freidlin and Korn, 2005\*) using logrank tests and Cox regression modeling in which patients who died prior to the event of interest (or who died from non-prostate cancer in the case of cause-specific mortality) were censored as of the time of death. Of note, for the secondary endpoints patients who received salvage treatment prior to the event were not censored. Chi-square tests and logistic regression analyses were performed to compare the treatment groups with respect to acute (within 90 days of completion of RT) and late (more than 90 days) toxicity. As mentioned above, quality of life measures will be analyzed in a separate report. All patients are included in the analyses with the exception of those found to have been ineligible (modified intent-to-treat). To adjust for multiple comparisons, the protocol stipulated that the one-sided p-value for secondary endpoints (with the exception of toxicity) should be  $<0.0125$  to declare statistical significance and that 97.5% confidence intervals be reported. The significance level for toxicity was  $1p < 0.025$ .

\*Freidlin B, Korn EL. Testing treatment effects in the presence of competing risks. *Stat Med.* 24:1703-1712, 2005.

**Supplementary Table S3: Treatment Compliance**  
**A: Radiation Therapy Delivery, Central Review of All Eligible Patients**

|                                | PBRT Alone<br>(n=564) |      | PBRT+STADT<br>(n=578) |      | PLNRT+PBRT+STADT<br>(n=574) |      | Total<br>(n=1716) |      |
|--------------------------------|-----------------------|------|-----------------------|------|-----------------------------|------|-------------------|------|
|                                | n                     | %    | n                     | %    | n                           | %    | n                 | %    |
| Total Dose                     | (n=564)               |      | (n=578)               |      | (n=574)                     |      | (n=1716)          |      |
| N/A                            | 1                     | 0.2  | 3                     | 0.5  | 3                           | 0.5  | 7                 | 0.4  |
| Per Protocol                   | 548                   | 97.2 | 559                   | 96.7 | 564                         | 98.3 | 1671              | 97.4 |
| Variation Acceptable           | 0                     | 0.0  | 1                     | 0.2  | 0                           | 0.0  | 1                 | 0.1  |
| Deviation Unacceptable         | 0                     | 0.0  | 2                     | 0.3  | 0                           | 0.0  | 2                 | 0.1  |
| Not evaluable                  | 15                    | 2.7  | 13                    | 2.2  | 7                           | 1.2  | 35                | 2.0  |
| Fractionation                  | (n=564)               |      | (n=578)               |      | (n=574)                     |      | (n=1716)          |      |
| N/A                            | 1                     | 0.2  | 3                     | 0.5  | 3                           | 0.5  | 7                 | 0.4  |
| Per Protocol                   | 541                   | 95.9 | 556                   | 96.2 | 557                         | 97.0 | 1654              | 96.4 |
| Variation Acceptable           | 4                     | 0.7  | 2                     | 0.3  | 3                           | 0.5  | 9                 | 0.5  |
| Deviation Unacceptable         | 3                     | 0.5  | 4                     | 0.7  | 4                           | 0.7  | 11                | 0.6  |
| Not evaluable                  | 15                    | 2.7  | 13                    | 2.2  | 7                           | 1.2  | 35                | 2.0  |
| Elapsed Days                   | (n=564)               |      | (n=578)               |      | (n=574)                     |      | (n=1716)          |      |
| N/A                            | 1                     | 0.2  | 3                     | 0.5  | 3                           | 0.5  | 7                 | 0.4  |
| Per Protocol                   | 544                   | 96.5 | 559                   | 96.7 | 560                         | 97.6 | 1663              | 96.9 |
| Variation Acceptable           | 3                     | 0.5  | 2                     | 0.3  | 4                           | 0.7  | 9                 | 0.5  |
| Deviation Unacceptable         | 1                     | 0.2  | 1                     | 0.2  | 0                           | 0.0  | 2                 | 0.1  |
| Not evaluable                  | 15                    | 2.7  | 13                    | 2.2  | 7                           | 1.2  | 35                | 2.0  |
| Target Volume / Organs at Risk | (n=564)               |      | (n=578)               |      | (n=574)                     |      | (n=1716)          |      |
| N/A                            | 0                     | 0.0  | 1                     | 0.2  | 2                           | 0.3  | 3                 | 0.2  |
| Per Protocol                   | 198                   | 35.1 | 197                   | 34.1 | 153                         | 26.7 | 548               | 31.9 |
| Variation Acceptable           | 318                   | 56.4 | 330                   | 57.1 | 366                         | 63.8 | 1014              | 59.1 |
| Deviation Unacceptable         | 27                    | 4.8  | 30                    | 5.2  | 41                          | 7.1  | 98                | 5.7  |
| Not evaluable                  | 21                    | 3.7  | 20                    | 3.5  | 12                          | 2.1  | 53                | 3.1  |
| Overall                        | (n=564)               |      | (n=578)               |      | (n=574)                     |      | (n=1716)          |      |
| Per Protocol                   | 472                   | 83.7 | 485                   | 83.9 | 459                         | 80.0 | 1416              | 82.5 |
| Variation-Acceptable           | 60                    | 10.6 | 59                    | 10.2 | 82                          | 14.3 | 201               | 11.7 |
| Deviation-Unacceptable         | 12                    | 2.1  | 12                    | 2.1  | 18                          | 3.1  | 42                | 2.4  |
| Incomplete RT - Refused        | 0                     | 0.0  | 2                     | 0.3  | 1                           | 0.2  | 3                 | 0.2  |
| No RT given                    | 2                     | 0.4  | 4                     | 0.7  | 3                           | 0.5  | 9                 | 0.5  |

**Supplementary Table S3: Treatment Compliance****A: Radiation Therapy Delivery, Central Review of All Eligible Patients**

|               | <b>PBRT Alone<br/>(n=564)</b> |          | <b>PBRT+STADT<br/>(n=578)</b> |          | <b>PLNRT+PBRT+STADT<br/>(n=574)</b> |          | <b>Total<br/>(n=1716)</b> |          |
|---------------|-------------------------------|----------|-------------------------------|----------|-------------------------------------|----------|---------------------------|----------|
|               | <b>n</b>                      | <b>%</b> | <b>n</b>                      | <b>%</b> | <b>n</b>                            | <b>%</b> | <b>n</b>                  | <b>%</b> |
| Not Evaluable | 18                            | 3.2      | 16                            | 2.8      | 11                                  | 1.9      | 45                        | 2.6      |

STADT = Short Term Androgen Deprivation Therapy.



**Supplementary Table S3: Treatment Compliance****B. Anti-Androgen Component of Androgen Deprivation Therapy, Central Review of Sampled Eligible Patients**

|                                                         | PBRT+STADT<br>(n=258) |      | PLNRT+PBRT+STADT<br>(n=255) |      | Total<br>(n=513) |      |
|---------------------------------------------------------|-----------------------|------|-----------------------------|------|------------------|------|
|                                                         | n                     | %    | n                           | %    | n                | %    |
| <b>Dose</b>                                             |                       |      |                             |      |                  |      |
| 80-120%                                                 | 189                   | 73.3 | 208                         | 81.6 | 397              | 77.4 |
| < 80%, due to protocol-specified reasons                | 7                     | 2.7  | 12                          | 4.7  | 19               | 3.7  |
| < 80%, due to non-protocol-specified reasons*           | 15                    | 5.8  | 13                          | 5.1  | 28               | 5.5  |
| > 120%*                                                 | 38                    | 14.7 | 15                          | 5.9  | 53               | 10.3 |
| No Treatment                                            | 9                     | 3.5  | 7                           | 2.7  | 16               | 3.1  |
| <b>Treatment delay</b>                                  |                       |      |                             |      |                  |      |
| No delays                                               | 246                   | 95.3 | 247                         | 96.9 | 493              | 96.1 |
| < 2 weeks                                               | 1                     | 0.4  | 1                           | 0.4  | 2                | 0.4  |
| > 2 weeks delay, due to non-protocol-specified reasons* | 2                     | 0.8  | 0                           | 0.0  | 2                | 0.4  |
| No Treatment                                            | 9                     | 3.5  | 7                           | 2.7  | 16               | 3.1  |
| <b>Overall score</b>                                    |                       |      |                             |      |                  |      |
| Per Protocol                                            | 195                   | 75.6 | 220                         | 86.3 | 415              | 80.9 |
| Unacceptable Deviation                                  | 54                    | 20.9 | 28                          | 11.0 | 82               | 16.0 |
| No Treatment                                            | 9                     | 3.5  | 7                           | 2.7  | 16               | 3.1  |

\*Unacceptable Deviation

STADT = Short Term Androgen Deprivation Therapy.

**Supplementary Table S3: Treatment Compliance****C. LHRH Targeted Component of Androgen Deprivation Therapy, Central Review of Sampled Eligible Patients**

|                                                         | PBRT+STADT<br>(n=258) |      | PLNRT+PBRT+STADT<br>(n=255) |      | Total<br>(n=513) |      |
|---------------------------------------------------------|-----------------------|------|-----------------------------|------|------------------|------|
|                                                         | n                     | %    | n                           | %    | n                | %    |
| Dose                                                    |                       |      |                             |      |                  |      |
| 80-120%                                                 | 223                   | 86.4 | 225                         | 88.2 | 448              | 87.3 |
| < 80%, due to protocol-specified reasons                | 1                     | 0.4  | 2                           | 0.8  | 3                | 0.6  |
| < 80%, due to non-protocol-specified reasons*           | 16                    | 6.2  | 8                           | 3.1  | 24               | 4.7  |
| > 120%*                                                 | 11                    | 4.3  | 13                          | 5.1  | 24               | 4.7  |
| Wrong drug/agent given*                                 | 0                     | 0.0  | 1                           | 0.4  | 1                | 0.2  |
| No Treatment                                            | 7                     | 2.7  | 6                           | 2.4  | 13               | 2.5  |
| Treatment delay                                         |                       |      |                             |      |                  |      |
| No delays                                               | 249                   | 96.5 | 249                         | 97.6 | 498              | 97.1 |
| > 2 weeks delay, due to non-protocol-specified reasons* | 2                     | 0.8  | 0                           | 0.0  | 2                | 0.4  |
| No Treatment                                            | 7                     | 2.7  | 6                           | 2.4  | 13               | 2.5  |
| Overall score                                           |                       |      |                             |      |                  |      |
| Per Protocol                                            | 223                   | 86.4 | 227                         | 89.0 | 450              | 87.7 |
| Unacceptable Deviation                                  | 28                    | 10.9 | 22                          | 8.6  | 50               | 9.7  |
| No Treatment                                            | 7                     | 2.7  | 6                           | 2.4  | 13               | 2.5  |

\*Unacceptable Deviation

STADT = Short Term Androgen Deprivation Therapy.

**Supplementary Table S4: Treatment Delivery**  
**A: Radiation Therapy Delivery, Site Reported for All Eligible Patients**

|                                                                | PBRT Alone<br>(n=564) |      | PBRT+STADT<br>(n=578) |      | PLNRT+PBRT+STADT<br>(n=574) |      | Total<br>(n=1716) |      |
|----------------------------------------------------------------|-----------------------|------|-----------------------|------|-----------------------------|------|-------------------|------|
|                                                                | n                     | %    | n                     | %    | n                           | %    | n                 | %    |
| Type of RT Administered                                        | (n=548)               |      | (n=562)               |      | (n=563)                     |      | (n=1673)          |      |
| 3D Conformal                                                   | 70                    | 12.8 | 68                    | 12.1 | 76                          | 13.5 | 214               | 12.8 |
| IMRT                                                           | 478                   | 87.2 | 494                   | 87.9 | 487                         | 86.5 | 1459              | 87.2 |
| Number of Fractions                                            | (n=548)               |      | (n=562)               |      | (n=563)                     |      | (n=1673)          |      |
| <36                                                            | 10                    | 1.8  | 8                     | 1.4  | 8                           | 1.4  | 26                | 1.6  |
| 36                                                             | 105                   | 19.2 | 95                    | 16.9 | 138                         | 24.5 | 338               | 20.2 |
| 37                                                             | 142                   | 25.9 | 153                   | 27.2 | 147                         | 26.1 | 442               | 26.4 |
| 38                                                             | 134                   | 24.5 | 135                   | 24.0 | 132                         | 23.4 | 401               | 24.0 |
| 39                                                             | 157                   | 28.6 | 171                   | 30.4 | 138                         | 24.5 | 466               | 27.9 |
| Total Dose to 95% PTV (Gy)                                     | (n=548)               |      | (n=562)               |      | (n=563)                     |      | (n=1673)          |      |
| Median                                                         | 68.4                  |      | 68.4                  |      | 66.6                        |      | 68.4              |      |
| Min - Max                                                      | 62.8 - 70.8           |      | 5.4 - 70.2            |      | 1.8 - 70.2                  |      | 1.8 - 70.8        |      |
| Q1 - Q3                                                        | 66.6 - 70.2           |      | 66.6 - 70.2           |      | 66.0 - 68.4                 |      | 66.6 - 70.2       |      |
| RT terminated early                                            | (n=3)                 | 0.5  | (n=6)                 | 1.0  | (n=11)                      | 1.9  | (n=20)            | 1.2  |
| Reason:                                                        |                       |      |                       |      |                             |      |                   |      |
| Toxicity                                                       | 0                     |      | 1                     |      | 0                           |      | 1                 |      |
| Patient refusal prior to beginning protocol therapy            | 1                     |      | 1                     |      | 0                           |      | 2                 |      |
| Patient withdrawal or refusal after beginning protocol therapy | 0                     |      | 2                     |      | 1                           |      | 3                 |      |
| Alternative treatment given                                    | 0                     |      | 0                     |      | 1                           |      | 1                 |      |
| Other complicating disease                                     | 1                     |      | 0                     |      | 1                           |      | 2                 |      |
| Other*                                                         | 1                     |      | 2                     |      | 8                           |      | 11                |      |

\*Other reasons include machine problems, patient not feeling well, no shows, or transportation issues.

STADT = Short Term Androgen Deprivation Therapy.

**Supplementary Table S4: Treatment Delivery**  
**B: Anti-Androgen (AA) Delivery, Site Reported for All Eligible Patients on Androgen Deprivation Therapy Arms**

|                                   | PBRT+STADT<br>(n=578) |      | PLNRT+PBRT+STADT<br>(n=574) |      | Total<br>(n=1152) |      |
|-----------------------------------|-----------------------|------|-----------------------------|------|-------------------|------|
|                                   | n                     | %    | n                           | %    | n                 | %    |
| Received AA                       | (n=578)               |      | (n=574)                     |      | (n=1152)          |      |
| No                                | 22                    | 3.8  | 18                          | 3.1  | 40                | 3.5  |
| Yes                               | 556                   | 96.2 | 556                         | 96.9 | 1112              | 96.5 |
| Reason AA not received            | (n=22)                |      | (n=18)                      |      | (n=40)            |      |
| Patient refusal prior to Tx start | 2                     | 9.1  | 3                           | 16.7 | 5                 | 12.5 |
| Other                             | 1                     | 4.5  | 1                           | 5.6  | 2                 | 5.0  |
| Missing/Unknown                   | 19                    | 86.4 | 14                          | 77.8 | 33                | 82.5 |
| AA Duration* (months)             | (n=548)               |      | (n=550)                     |      | (n=1098)          |      |
| Median                            | 3.9                   |      | 3.9                         |      | 3.9               |      |
| Min - Max                         | 0.3 - 8.7             |      | 0.1 - 6.9                   |      | 0.1 - 8.7         |      |
| Q1 - Q3                           | 3.6 - 4.1             |      | 3.7 - 4.1                   |      | 3.7 - 4.1         |      |
| Reason AA Terminated Early        | (n=556)               |      | (n=556)                     |      | (n=1112)          |      |
| Not applicable                    | 491                   | 88.3 | 492                         | 88.5 | 983               | 88.4 |
| Toxicity                          | 27                    | 4.9  | 25                          | 4.5  | 52                | 4.7  |
| Death                             | 0                     | 0.0  | 1                           | 0.2  | 1                 | 0.1  |
| Patient withdrawal or refusal     | 3                     | 0.5  | 2                           | 0.4  | 5                 | 0.4  |
| Other complicating disease        | 2                     | 0.4  | 1                           | 0.2  | 3                 | 0.3  |
| Other                             | 26                    | 4.7  | 30                          | 5.4  | 56                | 5.0  |
| Missing/Unknown                   | 7                     | 1.3  | 5                           | 0.9  | 12                | 1.1  |

\*Patients who received drug but do not have a duration have incomplete treatment data.

STADT = Short Term Androgen Deprivation Therapy.

**Supplementary Table S4: Treatment Delivery**

**C. LHRH Targeted Treatment Delivery Summary, Site Reported for All Eligible Patients on the Androgen Deprivation Therapy Arms**

|                                                                | PBRT+STADT<br>(n=578) |      | PLNRT+PBRT+STADT<br>(n=574) |      | Total<br>(n=1152) |      |
|----------------------------------------------------------------|-----------------------|------|-----------------------------|------|-------------------|------|
|                                                                | n                     | %    | n                           | %    | n                 | %    |
| Received LHRH                                                  | (n=578)               |      | (n=574)                     |      | (n=1152)          |      |
| No                                                             | 18                    | 3.1  | 18                          | 3.1  | 36                | 3.1  |
| Yes                                                            | 560                   | 96.9 | 556                         | 96.9 | 1116              | 96.9 |
| Reason LHRH not received                                       | (n=18)                |      | (n=18)                      |      | (n=36)            |      |
| Patient refusal prior to beginning protocol therapy            | 2                     | 11.1 | 4                           | 22.2 | 6                 | 16.7 |
| Missing/Unknown                                                | 16                    | 88.9 | 14                          | 77.8 | 30                | 83.3 |
| LHRH duration* (months)                                        | (n=555)               |      | (n=549)                     |      | (n=1104)          |      |
| 1-3                                                            | 15                    | 2.7  | 8                           | 1.5  | 23                | 2.1  |
| 4                                                              | 180                   | 32.4 | 170                         | 31.0 | 350               | 31.7 |
| 5                                                              | 9                     | 1.6  | 10                          | 1.8  | 19                | 1.7  |
| 6                                                              | 332                   | 59.8 | 348                         | 63.4 | 680               | 61.6 |
| 7-8                                                            | 12                    | 2.2  | 8                           | 1.5  | 20                | 1.8  |
| 9-12                                                           | 7                     | 1.3  | 5                           | 0.9  | 12                | 1.1  |
| LHRH Termination Reason                                        | (n=560)               |      | (n=556)                     |      | (n=1116)          |      |
| Not applicable                                                 | 534                   | 95.4 | 529                         | 95.1 | 1063              | 95.3 |
| Toxicity                                                       | 2                     | 0.4  | 4                           | 0.7  | 6                 | 0.5  |
| Death                                                          | 0                     | 0.0  | 1                           | 0.2  | 1                 | 0.1  |
| Patient withdrawal or refusal after beginning protocol therapy | 2                     | 0.4  | 1                           | 0.2  | 3                 | 0.3  |
| Alternative treatment given                                    | 1                     | 0.2  | 0                           | 0.0  | 1                 | 0.1  |
| Other                                                          | 11                    | 2.0  | 10                          | 1.8  | 21                | 1.9  |
| Missing/Unknown                                                | 10                    | 1.8  | 11                          | 2.0  | 21                | 1.9  |

\*Patients who received drug but do not have a duration have incomplete treatment data.

STADT = Short Term Androgen Deprivation Therapy.

**Supplementary Table S5: Cause of Death for All Eligible Patients**

|                                               | <b>PBRT Alone<br/>(n=69)</b> | <b>PBRT+STADT<br/>(n=63)</b> | <b>PLNRT+PBRT+STADT<br/>(n=69)</b> | <b>Total<br/>(n=201)</b> |
|-----------------------------------------------|------------------------------|------------------------------|------------------------------------|--------------------------|
| Death due to prostate cancer                  | 36 (52.2%)                   | 29 (46.0%)                   | 21 (30.4%)                         | 86 (42.8%)               |
| Centrally certified                           | 28 (40.6%)                   | 21 (33.3%)                   | 14 (20.3%)                         | 63 (31.3%)               |
| Following clinical or biochemical progression | 8 (11.6%)                    | 8 (12.7%)                    | 7 (10.1%)                          | 23 (11.4%)               |
| Death due to other causes                     | 33 (47.8%)                   | 30 (47.6%)                   | 47 (68.1%)                         | 110 (54.7%)              |
| Unknown                                       | 0 ( 0.0%)                    | 4 ( 6.3%)                    | 1 ( 1.4%)                          | 5 ( 2.5%)                |

STADT = Short Term Androgen Deprivation Therapy.

**Supplementary Table S6: Univariate and Multivariable Cox Regression Analyses – Time to Second Salvage Therapy by PSA at Entry**

| <b>Endpoint</b>                     | <b>#Events/n</b> | <b>Comparison</b> | <b>Unadjusted HR<br/>and CI<sup>1</sup></b> | <b>p-value<sup>2</sup></b> | <b>Adjusted HR<br/>and CI<sup>1</sup></b> | <b>p-value<sup>3</sup></b> |
|-------------------------------------|------------------|-------------------|---------------------------------------------|----------------------------|-------------------------------------------|----------------------------|
| Time to 2nd Salvage ADT<br>PSA≤0.35 | Arm1: 62/293     | Arm 3 vs. Arm 1   | 0.32 (0.18-0.55)                            | <0.001                     | 0.29 (0.17, 0.51)                         | <0.001                     |
|                                     | Arm2: 35/264     | Arm 2 vs. Arm 1   | 0.58 (0.36-0.93)                            | 0.005                      | 0.60 (0.37, 0.96)                         | 0.007                      |
|                                     | Arm3: 23/301     | Arm 3 vs. Arm 2   | 0.53 (0.29-0.96)                            | 0.007                      | 0.49 (0.27, 0.90)                         | 0.004                      |
| Time to 2nd Salvage ADT<br>PSA>0.35 | Arm1: 95/271     | Arm 3 vs. Arm 1   | 0.38 (0.25-0.57)                            | <0.001                     | 0.36 (0.24, 0.54)                         | <0.001                     |
|                                     | Arm2: 74/314     | Arm 2 vs. Arm 1   | 0.59 (0.42-0.84)                            | <0.001                     | 0.54 (0.38, 0.77)                         | <0.001                     |
|                                     | Arm3: 45/273     | Arm 3 vs. Arm 2   | 0.64 (0.42-0.98)                            | 0.009                      | 0.67 (0.44, 1.02)                         | 0.016                      |

Arm 1: PBRT Alone; Arm 2: PBRT+NC-STADT; Arm 3: PLNRT+PBRT+NC-STADT

<sup>1</sup> 97.5% confidence interval, adjusted for PSA, stage, SV involvement, Gleason score, age, and race.

<sup>2</sup> One-sided logrank test.

<sup>3</sup> One-sided Wald test.

**Supplementary Table S7: Patterns of Failure by Treatment Arm**

| <b>Recurrence</b>        | <b>PBRT Alone<br/>(n=103)</b> |          | <b>PBRT+STADT<br/>(n=71)</b> |          | <b>PLNRT+PBRT<br/>+STADT<br/>(n=49)</b> |          | <b>Total<br/>(n=223)</b> |          |
|--------------------------|-------------------------------|----------|------------------------------|----------|-----------------------------------------|----------|--------------------------|----------|
|                          | <b>n</b>                      | <b>%</b> | <b>n</b>                     | <b>%</b> | <b>n</b>                                | <b>%</b> | <b>Total</b>             | <b>%</b> |
| Local only               | 13                            | 12.6     | 4                            | 5.6      | 2                                       | 4.1      | 19                       | 8.5      |
| Regional only            | 19                            | 18.4     | 11                           | 15.5     | 6                                       | 12.2     | 36                       | 16.1     |
| Distant only             | 42                            | 40.8     | 39                           | 54.9     | 31                                      | 63.3     | 112                      | 50.2     |
| Local, Distant           | 7                             | 6.8      | 6                            | 8.5      | 3                                       | 6.1      | 16                       | 7.2      |
| Local, Regional          | 2                             | 1.9      | 0                            | 0.0      | 0                                       | 0.0      | 2                        | 0.9      |
| Regional, Distant        | 16                            | 15.5     | 9                            | 12.7     | 4                                       | 8.2      | 29                       | 13.0     |
| Local, Regional, Distant | 4                             | 3.9      | 2                            | 2.8      | 3                                       | 6.1      | 9                        | 4.0      |

STADT = Short Term Androgen Deprivation Therapy.



**Supplementary Table S8: 5-Year Survival or Cumulative Incidence Rates for Primary and Secondary Endpoints**

| <b>Endpoint</b>                              | <b>PBRT Alone</b>    | <b>PBRT+STADT</b>    | <b>PLNRT+PBRT+STADT</b> |
|----------------------------------------------|----------------------|----------------------|-------------------------|
| Freedom from Progression                     | 70.9% (67.0%, 74.9%) | 81.3% (78.0%, 84.6%) | 87.4% (84.7%, 90.2%)    |
| Distant Metastases                           | 8.5% (6.3%, 11.1%)   | 6.1% (4.3%, 8.3%)    | 4.5% (3.0%, 6.5%)       |
| Prostate Cancer Death                        | 2.9% (1.7%, 4.6%)    | 0.9% (0.4%, 2.1%)    | 0.7% (0.2%, 1.8%)       |
| Overall Survival                             | 93.5% (91.4%, 95.6%) | 96.1% (94.5%, 97.7%) | 95.8% (94.2%, 97.5%)    |
| Biochemical Failure (Phoenix)                | 20.3% (17.0%, 23.8%) | 14.0% (11.2%, 17.0%) | 8.3% (6.2%, 10.8%)      |
| Alternative (Secondary) Biochemical Failure* | 31.0% (27.1%, 34.9%) | 21.0% (17.7%, 24.5%) | 12.8% (10.2%, 15.8%)    |
| Time to 2nd Salvage ADT                      | 22.2% (18.7%, 25.8%) | 14.5% (11.7%, 17.7%) | 7.9% (5.9%, 10.4%)      |
| Castrate Resistant Disease**                 | 2.9% (1.7%, 4.6%)    | 2.1% (1.1%, 3.6%)    | 1.1% (0.5%, 2.3%)       |
| Local Failure                                | 3.2% (1.9%, 4.9%)    | 1.5% (0.7%, 2.8%)    | 0.4% (0.1%, 1.2%)       |
| Regional Failure                             | 4.7% (3.1%, 6.8%)    | 2.2% (1.2%, 3.7%)    | 0.7% (0.2%, 1.7%)       |
| Distant Metastases-Free Survival             | 87.5% (84.7%, 90.3%) | 91.4% (89.0%, 93.7%) | 91.9% (89.6%, 94.1%)    |

\* PSA > 0.4 and a second rise above nadir or start of second salvage therapy

\*\*Three rises in PSA after institution of salvage hormone therapy

STADT = Short Term Androgen Deprivation Therapy

**Supplementary Table S9: Acute\* Adverse Events without Regard to Attribution**  
**Adverse Event Categories of Interest**  
**Distribution of Patients by Highest Grade Acute Adverse Event and by**  
**Specific Adverse Event Term Within Blood/Bone Marrow, GI, Renal GU System Organ Class**

| Category/Term              | PBRT Alone (n=547)†            |       |       |       |       | PBRT+STADT (n=563)†            |       |       |       |       | PLNRT+PBRT+STADT (n=563)†      |       |       |       |       |
|----------------------------|--------------------------------|-------|-------|-------|-------|--------------------------------|-------|-------|-------|-------|--------------------------------|-------|-------|-------|-------|
|                            | n and (%) of Patients by Grade |       |       |       |       | n and (%) of Patients by Grade |       |       |       |       | n and (%) of Patients by Grade |       |       |       |       |
|                            | 1                              | 2     | 3     | 4     | 5     | 1                              | 2     | 3     | 4     | 5     | 1                              | 2     | 3     | 4     | 5     |
| <b>BLOOD/BONE MARROW</b>   | 16                             | 9     | 3     | 0     | 0     | 49                             | 9     | 1     | 0     | 0     | 35                             | 14    | 15    | 0     | 0     |
|                            | (2.9)                          | (1.6) | (0.5) | (0.0) | (0.0) | (8.7)                          | (1.6) | (0.2) | (0.0) | (0.0) | (6.2)                          | (2.5) | (2.7) | (0.0) | (0.0) |
| Blood disorder             | 1                              | 0     | 1     | 0     | 0     | 7                              | 0     | 0     | 0     | 0     | 3                              | 0     | 0     | 0     | 0     |
|                            | (0.2)                          | (0.0) | (0.2) | (0.0) | (0.0) | (1.2)                          | (0.0) | (0.0) | (0.0) | (0.0) | (0.5)                          | (0.0) | (0.0) | (0.0) | (0.0) |
| CD4 lymphocytes decreased  | 0                              | 0     | 0     | 0     | 0     | 0                              | 0     | 0     | 0     | 0     | 1                              | 0     | 0     | 0     | 0     |
|                            | (0.0)                          | (0.0) | (0.0) | (0.0) | (0.0) | (0.0)                          | (0.0) | (0.0) | (0.0) | (0.0) | (0.2)                          | (0.0) | (0.0) | (0.0) | (0.0) |
| Hemoglobin decreased       | 11                             | 0     | 0     | 0     | 0     | 44                             | 3     | 0     | 0     | 0     | 39                             | 3     | 0     | 0     | 0     |
|                            | (2.0)                          | (0.0) | (0.0) | (0.0) | (0.0) | (7.8)                          | (0.5) | (0.0) | (0.0) | (0.0) | (6.9)                          | (0.5) | (0.0) | (0.0) | (0.0) |
| Hemolysis                  | 0                              | 0     | 0     | 0     | 0     | 0                              | 1     | 0     | 0     | 0     | 0                              | 0     | 0     | 0     | 0     |
|                            | (0.0)                          | (0.0) | (0.0) | (0.0) | (0.0) | (0.0)                          | (0.2) | (0.0) | (0.0) | (0.0) | (0.0)                          | (0.0) | (0.0) | (0.0) | (0.0) |
| Leukopenia                 | 13                             | 2     | 2     | 0     | 0     | 12                             | 3     | 0     | 0     | 0     | 13                             | 2     | 0     | 0     | 0     |
|                            | (2.4)                          | (0.4) | (0.4) | (0.0) | (0.0) | (2.1)                          | (0.5) | (0.0) | (0.0) | (0.0) | (2.3)                          | (0.4) | (0.0) | (0.0) | (0.0) |
| Lymphopenia                | 2                              | 7     | 0     | 0     | 0     | 3                              | 3     | 1     | 0     | 0     | 7                              | 12    | 15    | 0     | 0     |
|                            | (0.4)                          | (1.3) | (0.0) | (0.0) | (0.0) | (0.5)                          | (0.5) | (0.2) | (0.0) | (0.0) | (1.2)                          | (2.1) | (2.7) | (0.0) | (0.0) |
| Neutrophil count decreased | 2                              | 0     | 2     | 0     | 0     | 3                              | 0     | 0     | 0     | 0     | 5                              | 1     | 0     | 0     | 0     |
|                            | (0.4)                          | (0.0) | (0.4) | (0.0) | (0.0) | (0.5)                          | (0.0) | (0.0) | (0.0) | (0.0) | (0.9)                          | (0.2) | (0.0) | (0.0) | (0.0) |
| Platelet count decreased   | 5                              | 0     | 0     | 0     | 0     | 7                              | 0     | 0     | 0     | 0     | 8                              | 0     | 0     | 0     | 0     |
|                            | (0.9)                          | (0.0) | (0.0) | (0.0) | (0.0) | (1.2)                          | (0.0) | (0.0) | (0.0) | (0.0) | (1.4)                          | (0.0) | (0.0) | (0.0) | (0.0) |
| <b>GASTROINTESTINAL</b>    | 78                             | 10    | 1     | 0     | 0     | 92                             | 17    | 5     | 0     | 0     | 144                            | 34    | 4     | 0     | 0     |
|                            | (14.3)                         | (1.8) | (0.2) | (0.0) | (0.0) | (16.3)                         | (3.0) | (0.9) | (0.0) | (0.0) | (25.6)                         | (6.0) | (0.7) | (0.0) | (0.0) |
| Abdominal distension       | 1                              | 1     | 0     | 0     | 0     | 1                              | 1     | 0     | 0     | 0     | 4                              | 0     | 1     | 0     | 0     |
|                            | (0.2)                          | (0.2) | (0.0) | (0.0) | (0.0) | (0.2)                          | (0.2) | (0.0) | (0.0) | (0.0) | (0.7)                          | (0.0) | (0.2) | (0.0) | (0.0) |
| Anal exam abnormal         | 1                              | 0     | 0     | 0     | 0     | 0                              | 0     | 0     | 0     | 0     | 0                              | 0     | 0     | 0     | 0     |
|                            | (0.2)                          | (0.0) | (0.0) | (0.0) | (0.0) | (0.0)                          | (0.0) | (0.0) | (0.0) | (0.0) | (0.0)                          | (0.0) | (0.0) | (0.0) | (0.0) |
| Anal fistula               | 1                              | 0     | 0     | 0     | 0     | 0                              | 0     | 0     | 0     | 0     | 0                              | 0     | 0     | 0     | 0     |
|                            | (0.2)                          | (0.0) | (0.0) | (0.0) | (0.0) | (0.0)                          | (0.0) | (0.0) | (0.0) | (0.0) | (0.0)                          | (0.0) | (0.0) | (0.0) | (0.0) |
| Anal mucositis             | 0                              | 0     | 0     | 0     | 0     | 1                              | 0     | 0     | 0     | 0     | 1                              | 0     | 0     | 0     | 0     |
|                            | (0.0)                          | (0.0) | (0.0) | (0.0) | (0.0) | (0.2)                          | (0.0) | (0.0) | (0.0) | (0.0) | (0.2)                          | (0.0) | (0.0) | (0.0) | (0.0) |
| Anorexia                   | 1                              | 0     | 0     | 0     | 0     | 3                              | 0     | 0     | 0     | 0     | 5                              | 0     | 0     | 0     | 0     |
|                            | (0.2)                          | (0.0) | (0.0) | (0.0) | (0.0) | (0.5)                          | (0.0) | (0.0) | (0.0) | (0.0) | (0.9)                          | (0.0) | (0.0) | (0.0) | (0.0) |
| Colitis                    | 0                              | 0     | 0     | 0     | 0     | 0                              | 1     | 0     | 0     | 0     | 0                              | 0     | 0     | 0     | 0     |
|                            | (0.0)                          | (0.0) | (0.0) | (0.0) | (0.0) | (0.0)                          | (0.2) | (0.0) | (0.0) | (0.0) | (0.0)                          | (0.0) | (0.0) | (0.0) | (0.0) |
| Constipation               | 12                             | 1     | 0     | 0     | 0     | 22                             | 4     | 0     | 0     | 0     | 19                             | 2     | 1     | 0     | 0     |



**Supplementary Table S9: Acute\* Adverse Events without Regard to Attribution**  
**Adverse Event Categories of Interest**  
**Distribution of Patients by Highest Grade Acute Adverse Event and by**  
**Specific Adverse Event Term Within Blood/Bone Marrow, GI, Renal GU System Organ Class**

| Category/Term                | PBRT Alone (n=547)†            |              |              |              |              | PBRT+STADT (n=563)†            |               |              |              |              | PLNRT+PBRT+STADT (n=563)†      |               |              |              |              |
|------------------------------|--------------------------------|--------------|--------------|--------------|--------------|--------------------------------|---------------|--------------|--------------|--------------|--------------------------------|---------------|--------------|--------------|--------------|
|                              | n and (%) of Patients by Grade |              |              |              |              | n and (%) of Patients by Grade |               |              |              |              | n and (%) of Patients by Grade |               |              |              |              |
|                              | 1                              | 2            | 3            | 4            | 5            | 1                              | 2             | 3            | 4            | 5            | 1                              | 2             | 3            | 4            | 5            |
| Rectal mucositis             | 0                              | 0            | 0            | 0            | 0            | 1                              | 0             | 0            | 0            | 0            | 0                              | 0             | 0            | 0            | 0            |
|                              | (0.0)                          | (0.0)        | (0.0)        | (0.0)        | (0.0)        | (0.2)                          | (0.0)         | (0.0)        | (0.0)        | (0.0)        | (0.0)                          | (0.0)         | (0.0)        | (0.0)        | (0.0)        |
| Small intestinal obstruction | 0                              | 0            | 0            | 0            | 0            | 0                              | 0             | 1            | 0            | 0            | 0                              | 0             | 0            | 0            | 0            |
|                              | (0.0)                          | (0.0)        | (0.0)        | (0.0)        | (0.0)        | (0.0)                          | (0.0)         | (0.2)        | (0.0)        | (0.0)        | (0.0)                          | (0.0)         | (0.0)        | (0.0)        | (0.0)        |
| Taste alteration             | 0                              | 0            | 0            | 0            | 0            | 3                              | 0             | 0            | 0            | 0            | 2                              | 0             | 0            | 0            | 0            |
|                              | (0.0)                          | (0.0)        | (0.0)        | (0.0)        | (0.0)        | (0.5)                          | (0.0)         | (0.0)        | (0.0)        | (0.0)        | (0.4)                          | (0.0)         | (0.0)        | (0.0)        | (0.0)        |
| Vomiting                     | 1                              | 1            | 0            | 0            | 0            | 1                              | 2             | 0            | 0            | 0            | 4                              | 0             | 0            | 0            | 0            |
|                              | (0.2)                          | (0.2)        | (0.0)        | (0.0)        | (0.0)        | (0.2)                          | (0.4)         | (0.0)        | (0.0)        | (0.0)        | (0.7)                          | (0.0)         | (0.0)        | (0.0)        | (0.0)        |
| <b>RENAL/GENITOURINARY</b>   | <b>82</b>                      | <b>44</b>    | <b>5</b>     | <b>0</b>     | <b>0</b>     | <b>129</b>                     | <b>63</b>     | <b>5</b>     | <b>0</b>     | <b>0</b>     | <b>144</b>                     | <b>59</b>     | <b>6</b>     | <b>2</b>     | <b>0</b>     |
|                              | <b>(15.0)</b>                  | <b>(8.0)</b> | <b>(0.9)</b> | <b>(0.0)</b> | <b>(0.0)</b> | <b>(22.9)</b>                  | <b>(11.2)</b> | <b>(0.9)</b> | <b>(0.0)</b> | <b>(0.0)</b> | <b>(25.6)</b>                  | <b>(10.5)</b> | <b>(1.1)</b> | <b>(0.4)</b> | <b>(0.0)</b> |
| Bladder spasm                | 1                              | 1            | 0            | 0            | 0            | 0                              | 3             | 1            | 0            | 0            | 1                              | 0             | 0            | 0            | 0            |
|                              | (0.2)                          | (0.2)        | (0.0)        | (0.0)        | (0.0)        | (0.0)                          | (0.5)         | (0.2)        | (0.0)        | (0.0)        | (0.2)                          | (0.0)         | (0.0)        | (0.0)        | (0.0)        |
| Bladder stenosis             | 0                              | 0            | 0            | 0            | 0            | 0                              | 0             | 0            | 0            | 0            | 1                              | 0             | 0            | 0            | 0            |
|                              | (0.0)                          | (0.0)        | (0.0)        | (0.0)        | (0.0)        | (0.0)                          | (0.0)         | (0.0)        | (0.0)        | (0.0)        | (0.2)                          | (0.0)         | (0.0)        | (0.0)        | (0.0)        |
| Cystitis                     | 3                              | 8            | 0            | 0            | 0            | 6                              | 7             | 1            | 0            | 0            | 6                              | 7             | 0            | 0            | 0            |
|                              | (0.5)                          | (1.5)        | (0.0)        | (0.0)        | (0.0)        | (1.1)                          | (1.2)         | (0.2)        | (0.0)        | (0.0)        | (1.1)                          | (1.2)         | (0.0)        | (0.0)        | (0.0)        |
| Prostatic disorder           | 0                              | 0            | 0            | 0            | 0            | 0                              | 0             | 0            | 0            | 0            | 0                              | 1             | 0            | 0            | 0            |
|                              | (0.0)                          | (0.0)        | (0.0)        | (0.0)        | (0.0)        | (0.0)                          | (0.0)         | (0.0)        | (0.0)        | (0.0)        | (0.0)                          | (0.2)         | (0.0)        | (0.0)        | (0.0)        |
| Ureteric anastomotic leak    | 0                              | 0            | 0            | 0            | 0            | 0                              | 0             | 0            | 0            | 0            | 1                              | 0             | 0            | 0            | 0            |
|                              | (0.0)                          | (0.0)        | (0.0)        | (0.0)        | (0.0)        | (0.0)                          | (0.0)         | (0.0)        | (0.0)        | (0.0)        | (0.2)                          | (0.0)         | (0.0)        | (0.0)        | (0.0)        |
| Ureteric obstruction         | 0                              | 0            | 0            | 0            | 0            | 1                              | 0             | 0            | 0            | 0            | 0                              | 0             | 0            | 0            | 0            |
|                              | (0.0)                          | (0.0)        | (0.0)        | (0.0)        | (0.0)        | (0.2)                          | (0.0)         | (0.0)        | (0.0)        | (0.0)        | (0.0)                          | (0.0)         | (0.0)        | (0.0)        | (0.0)        |
| Ureteric perforation         | 1                              | 0            | 0            | 0            | 0            | 0                              | 0             | 0            | 0            | 0            | 0                              | 0             | 0            | 0            | 0            |
|                              | (0.2)                          | (0.0)        | (0.0)        | (0.0)        | (0.0)        | (0.0)                          | (0.0)         | (0.0)        | (0.0)        | (0.0)        | (0.0)                          | (0.0)         | (0.0)        | (0.0)        | (0.0)        |
| Urethral obstruction         | 0                              | 0            | 0            | 0            | 0            | 1                              | 1             | 2            | 0            | 0            | 0                              | 2             | 0            | 0            | 0            |
|                              | (0.0)                          | (0.0)        | (0.0)        | (0.0)        | (0.0)        | (0.2)                          | (0.2)         | (0.4)        | (0.0)        | (0.0)        | (0.0)                          | (0.4)         | (0.0)        | (0.0)        | (0.0)        |
| Urethral stricture           | 0                              | 0            | 1            | 0            | 0            | 0                              | 1             | 0            | 0            | 0            | 0                              | 1             | 0            | 0            | 0            |
|                              | (0.0)                          | (0.0)        | (0.2)        | (0.0)        | (0.0)        | (0.0)                          | (0.2)         | (0.0)        | (0.0)        | (0.0)        | (0.0)                          | (0.2)         | (0.0)        | (0.0)        | (0.0)        |
| Urinary frequency            | 72                             | 28           | 2            | 0            | 0            | 116                            | 41            | 2            | 0            | 0            | 127                            | 43            | 4            | 0            | 0            |
|                              | (13.2)                         | (5.1)        | (0.4)        | (0.0)        | (0.0)        | (20.6)                         | (7.3)         | (0.4)        | (0.0)        | (0.0)        | (22.6)                         | (7.6)         | (0.7)        | (0.0)        | (0.0)        |
| Urinary incontinence         | 13                             | 15           | 1            | 0            | 0            | 27                             | 26            | 0            | 0            | 0            | 31                             | 11            | 1            | 2            | 0            |
|                              | (2.4)                          | (2.7)        | (0.2)        | (0.0)        | (0.0)        | (4.8)                          | (4.6)         | (0.0)        | (0.0)        | (0.0)        | (5.5)                          | (2.0)         | (0.2)        | (0.4)        | (0.0)        |
| Urinary retention            | 10                             | 5            | 0            | 0            | 0            | 13                             | 3             | 1            | 0            | 0            | 11                             | 3             | 0            | 0            | 0            |

**Supplementary Table S9: Acute\* Adverse Events without Regard to Attribution**  
**Adverse Event Categories of Interest**  
**Distribution of Patients by Highest Grade Acute Adverse Event and by**  
**Specific Adverse Event Term Within Blood/Bone Marrow, GI, Renal GU System Organ Class**

| Category/Term       | PBRT Alone (n=547)†            |       |       |       |       | PBRT+STADT (n=563)†            |       |       |       |       | PLNRT+PBRT+STADT (n=563)†      |       |       |       |       |
|---------------------|--------------------------------|-------|-------|-------|-------|--------------------------------|-------|-------|-------|-------|--------------------------------|-------|-------|-------|-------|
|                     | n and (%) of Patients by Grade |       |       |       |       | n and (%) of Patients by Grade |       |       |       |       | n and (%) of Patients by Grade |       |       |       |       |
|                     | 1                              | 2     | 3     | 4     | 5     | 1                              | 2     | 3     | 4     | 5     | 1                              | 2     | 3     | 4     | 5     |
| Urogenital disorder | (1.8)                          | (0.9) | (0.0) | (0.0) | (0.0) | (2.3)                          | (0.5) | (0.2) | (0.0) | (0.0) | (2.0)                          | (0.5) | (0.0) | (0.0) | (0.0) |
|                     | 18                             | 4     | 1     | 0     | 0     | 17                             | 1     | 1     | 0     | 0     | 22                             | 7     | 1     | 0     | 0     |
|                     | (3.3)                          | (0.7) | (0.2) | (0.0) | (0.0) | (3.0)                          | (0.2) | (0.2) | (0.0) | (0.0) | (3.9)                          | (1.2) | (0.2) | (0.0) | (0.0) |

Adverse events were graded with CTCAE version 3.0.

\*Acute: ≤ 90 days after End of Radiation Therapy or No Radiation Therapy Received

†17, 15, and 11 patients from PBRT Alone, PBRT+STADT, and PLNRT+PBRT+STADT arms, respectively, who received no treatment or for whom no acute AE information was provided are excluded.

**Supplementary Table S10: Late\* Adverse Events without Regard to Attribution**  
**Adverse Event Categories of Interest**  
**Distribution of Patients by Highest Grade Adverse Event and by Specific Adverse Event Term**

| Category/Term              | PBRT Alone (n=545) <sup>a</sup> |       |       |       |       | PBRT+STADT (n=559) <sup>b</sup> |       |       |       |       | PLNRT+PBRT+STADT (n=562) <sup>c</sup> |       |       |       |       |
|----------------------------|---------------------------------|-------|-------|-------|-------|---------------------------------|-------|-------|-------|-------|---------------------------------------|-------|-------|-------|-------|
|                            | n and (%) of Patients by Grade  |       |       |       |       | n and (%) of Patients by Grade  |       |       |       |       | n and (%) of Patients by Grade        |       |       |       |       |
|                            | 1                               | 2     | 3     | 4     | 5     | 1                               | 2     | 3     | 4     | 5     | 1                                     | 2     | 3     | 4     | 5     |
| BLOOD/BONE MARROW          | 39                              | 17    | 1     | 2     | 0     | 51                              | 8     | 2     | 0     | 0     | 48                                    | 18    | 5     | 2     | 0     |
|                            | (7.2)                           | (3.1) | (0.2) | (0.4) | (0.0) | (9.1)                           | (1.4) | (0.4) | (0.0) | (0.0) | (8.5)                                 | (3.2) | (0.9) | (0.4) | (0.0) |
| Blood disorder             | 5                               | 1     | 0     | 1     | 0     | 4                               | 0     | 0     | 0     | 0     | 2                                     | 0     | 0     | 0     | 0     |
|                            | (0.9)                           | (0.2) | (0.0) | (0.2) | (0.0) | (0.7)                           | (0.0) | (0.0) | (0.0) | (0.0) | (0.4)                                 | (0.0) | (0.0) | (0.0) | (0.0) |
| CD4 lymphocytes decreased  | 0                               | 1     | 0     | 0     | 0     | 0                               | 0     | 0     | 0     | 0     | 2                                     | 0     | 0     | 0     | 0     |
|                            | (0.0)                           | (0.2) | (0.0) | (0.0) | (0.0) | (0.0)                           | (0.0) | (0.0) | (0.0) | (0.0) | (0.4)                                 | (0.0) | (0.0) | (0.0) | (0.0) |
| Hemoglobin decreased       | 20                              | 4     | 1     | 0     | 0     | 43                              | 1     | 0     | 0     | 0     | 50                                    | 3     | 1     | 1     | 0     |
|                            | (3.7)                           | (0.7) | (0.2) | (0.0) | (0.0) | (7.7)                           | (0.2) | (0.0) | (0.0) | (0.0) | (8.9)                                 | (0.5) | (0.2) | (0.2) | (0.0) |
| Hemolysis                  | 0                               | 0     | 0     | 0     | 0     | 1                               | 0     | 0     | 0     | 0     | 0                                     | 0     | 0     | 0     | 0     |
|                            | (0.0)                           | (0.0) | (0.0) | (0.0) | (0.0) | (0.2)                           | (0.0) | (0.0) | (0.0) | (0.0) | (0.0)                                 | (0.0) | (0.0) | (0.0) | (0.0) |
| Leukopenia                 | 19                              | 2     | 1     | 0     | 0     | 15                              | 2     | 1     | 0     | 0     | 19                                    | 8     | 0     | 0     | 0     |
|                            | (3.5)                           | (0.4) | (0.2) | (0.0) | (0.0) | (2.7)                           | (0.4) | (0.2) | (0.0) | (0.0) | (3.4)                                 | (1.4) | (0.0) | (0.0) | (0.0) |
| Lymphopenia                | 10                              | 11    | 0     | 0     | 0     | 14                              | 5     | 1     | 0     | 0     | 15                                    | 11    | 3     | 0     | 0     |
|                            | (1.8)                           | (2.0) | (0.0) | (0.0) | (0.0) | (2.5)                           | (0.9) | (0.2) | (0.0) | (0.0) | (2.7)                                 | (2.0) | (0.5) | (0.0) | (0.0) |
| Neutrophil count decreased | 3                               | 2     | 0     | 1     | 0     | 3                               | 1     | 0     | 0     | 0     | 4                                     | 3     | 0     | 0     | 0     |
|                            | (0.6)                           | (0.4) | (0.0) | (0.2) | (0.0) | (0.5)                           | (0.2) | (0.0) | (0.0) | (0.0) | (0.7)                                 | (0.5) | (0.0) | (0.0) | (0.0) |
| Platelet count decreased   | 14                              | 1     | 2     | 0     | 0     | 6                               | 0     | 0     | 0     | 0     | 4                                     | 0     | 1     | 1     | 0     |
|                            | (2.6)                           | (0.2) | (0.4) | (0.0) | (0.0) | (1.1)                           | (0.0) | (0.0) | (0.0) | (0.0) | (0.7)                                 | (0.0) | (0.2) | (0.2) | (0.0) |
| GASTROINTESTINAL           | 119                             | 52    | 4     | 0     | 0     | 110                             | 52    | 5     | 0     | 0     | 136                                   | 43    | 8     | 0     | 0     |
|                            | (21.8)                          | (9.5) | (0.7) | (0.0) | (0.0) | (19.7)                          | (9.3) | (0.9) | (0.0) | (0.0) | (24.2)                                | (7.7) | (1.4) | (0.0) | (0.0) |
| Abdominal distension       | 3                               | 2     | 1     | 0     | 0     | 3                               | 2     | 1     | 0     | 0     | 1                                     | 2     | 0     | 0     | 0     |
|                            | (0.6)                           | (0.4) | (0.2) | (0.0) | (0.0) | (0.5)                           | (0.4) | (0.2) | (0.0) | (0.0) | (0.2)                                 | (0.4) | (0.0) | (0.0) | (0.0) |
| Anal fistula               | 1                               | 0     | 0     | 0     | 0     | 0                               | 0     | 0     | 0     | 0     | 0                                     | 0     | 1     | 0     | 0     |
|                            | (0.2)                           | (0.0) | (0.0) | (0.0) | (0.0) | (0.0)                           | (0.0) | (0.0) | (0.0) | (0.0) | (0.0)                                 | (0.0) | (0.2) | (0.0) | (0.0) |
| Anal mucositis             | 0                               | 0     | 0     | 0     | 0     | 2                               | 0     | 0     | 0     | 0     | 0                                     | 0     | 0     | 0     | 0     |
|                            | (0.0)                           | (0.0) | (0.0) | (0.0) | (0.0) | (0.4)                           | (0.0) | (0.0) | (0.0) | (0.0) | (0.0)                                 | (0.0) | (0.0) | (0.0) | (0.0) |
| Anal ulcer                 | 0                               | 0     | 0     | 0     | 0     | 0                               | 1     | 0     | 0     | 0     | 0                                     | 0     | 0     | 0     | 0     |
|                            | (0.0)                           | (0.0) | (0.0) | (0.0) | (0.0) | (0.0)                           | (0.2) | (0.0) | (0.0) | (0.0) | (0.0)                                 | (0.0) | (0.0) | (0.0) | (0.0) |
| Anorexia                   | 0                               | 2     | 0     | 0     | 0     | 3                               | 0     | 0     | 0     | 0     | 4                                     | 0     | 0     | 0     | 0     |
|                            | (0.0)                           | (0.4) | (0.0) | (0.0) | (0.0) | (0.5)                           | (0.0) | (0.0) | (0.0) | (0.0) | (0.7)                                 | (0.0) | (0.0) | (0.0) | (0.0) |
| Colitis                    | 0                               | 0     | 0     | 0     | 0     | 1                               | 2     | 1     | 0     | 0     | 1                                     | 2     | 0     | 0     | 0     |
|                            | (0.0)                           | (0.0) | (0.0) | (0.0) | (0.0) | (0.2)                           | (0.4) | (0.2) | (0.0) | (0.0) | (0.2)                                 | (0.4) | (0.0) | (0.0) | (0.0) |
| Colonic obstruction        | 0                               | 0     | 0     | 0     | 0     | 0                               | 1     | 0     | 0     | 0     | 0                                     | 0     | 2     | 0     | 0     |
|                            | (0.0)                           | (0.0) | (0.0) | (0.0) | (0.0) | (0.0)                           | (0.2) | (0.0) | (0.0) | (0.0) | (0.0)                                 | (0.0) | (0.4) | (0.0) | (0.0) |

**Supplementary Table S10: Late\* Adverse Events without Regard to Attribution**  
**Adverse Event Categories of Interest**  
**Distribution of Patients by Highest Grade Adverse Event and by Specific Adverse Event Term**

| Category/Term             | PBRT Alone (n=545) <sup>a</sup> |            |            |            |            | PBRT+STADT (n=559) <sup>b</sup> |             |            |            |            | PLNRT+PBRT+STADT (n=562) <sup>c</sup> |             |            |            |            |
|---------------------------|---------------------------------|------------|------------|------------|------------|---------------------------------|-------------|------------|------------|------------|---------------------------------------|-------------|------------|------------|------------|
|                           | n and (%) of Patients by Grade  |            |            |            |            | n and (%) of Patients by Grade  |             |            |            |            | n and (%) of Patients by Grade        |             |            |            |            |
|                           | 1                               | 2          | 3          | 4          | 5          | 1                               | 2           | 3          | 4          | 5          | 1                                     | 2           | 3          | 4          | 5          |
| Constipation              | 40<br>(7.3)                     | 7<br>(1.3) | 0<br>(0.0) | 0<br>(0.0) | 0<br>(0.0) | 23<br>(4.1)                     | 12<br>(2.1) | 0<br>(0.0) | 0<br>(0.0) | 0<br>(0.0) | 36<br>(6.4)                           | 7<br>(1.2)  | 0<br>(0.0) | 0<br>(0.0) | 0<br>(0.0) |
| Dehydration               | 0<br>(0.0)                      | 0<br>(0.0) | 0<br>(0.0) | 0<br>(0.0) | 0<br>(0.0) | 0<br>(0.0)                      | 1<br>(0.2)  | 0<br>(0.0) | 0<br>(0.0) | 0<br>(0.0) | 0<br>(0.0)                            | 0<br>(0.0)  | 0<br>(0.0) | 0<br>(0.0) | 0<br>(0.0) |
| Diarrhea                  | 67<br>(12.3)                    | 5<br>(0.9) | 0<br>(0.0) | 0<br>(0.0) | 0<br>(0.0) | 65<br>(11.6)                    | 12<br>(2.1) | 0<br>(0.0) | 0<br>(0.0) | 0<br>(0.0) | 99<br>(17.6)                          | 10<br>(1.8) | 1<br>(0.2) | 0<br>(0.0) | 0<br>(0.0) |
| Dry mouth                 | 1<br>(0.2)                      | 0<br>(0.0) | 0<br>(0.0) | 0<br>(0.0) | 0<br>(0.0) | 1<br>(0.2)                      | 1<br>(0.2)  | 0<br>(0.0) | 0<br>(0.0) | 0<br>(0.0) | 2<br>(0.4)                            | 0<br>(0.0)  | 0<br>(0.0) | 0<br>(0.0) | 0<br>(0.0) |
| Dyspepsia                 | 2<br>(0.4)                      | 0<br>(0.0) | 0<br>(0.0) | 0<br>(0.0) | 0<br>(0.0) | 5<br>(0.9)                      | 1<br>(0.2)  | 0<br>(0.0) | 0<br>(0.0) | 0<br>(0.0) | 5<br>(0.9)                            | 2<br>(0.4)  | 0<br>(0.0) | 0<br>(0.0) | 0<br>(0.0) |
| Dysphagia                 | 1<br>(0.2)                      | 0<br>(0.0) | 0<br>(0.0) | 0<br>(0.0) | 0<br>(0.0) | 5<br>(0.9)                      | 0<br>(0.0)  | 0<br>(0.0) | 0<br>(0.0) | 0<br>(0.0) | 0<br>(0.0)                            | 0<br>(0.0)  | 0<br>(0.0) | 0<br>(0.0) | 0<br>(0.0) |
| Enteritis                 | 0<br>(0.0)                      | 0<br>(0.0) | 0<br>(0.0) | 0<br>(0.0) | 0<br>(0.0) | 0<br>(0.0)                      | 1<br>(0.2)  | 0<br>(0.0) | 0<br>(0.0) | 0<br>(0.0) | 1<br>(0.2)                            | 0<br>(0.0)  | 0<br>(0.0) | 0<br>(0.0) | 0<br>(0.0) |
| Esophagitis               | 0<br>(0.0)                      | 0<br>(0.0) | 0<br>(0.0) | 0<br>(0.0) | 0<br>(0.0) | 1<br>(0.2)                      | 0<br>(0.0)  | 0<br>(0.0) | 0<br>(0.0) | 0<br>(0.0) | 1<br>(0.2)                            | 0<br>(0.0)  | 0<br>(0.0) | 0<br>(0.0) | 0<br>(0.0) |
| Fecal incontinence        | 13<br>(2.4)                     | 4<br>(0.7) | 0<br>(0.0) | 0<br>(0.0) | 0<br>(0.0) | 7<br>(1.3)                      | 0<br>(0.0)  | 1<br>(0.2) | 0<br>(0.0) | 0<br>(0.0) | 13<br>(2.3)                           | 3<br>(0.5)  | 0<br>(0.0) | 0<br>(0.0) | 0<br>(0.0) |
| Flatulence                | 4<br>(0.7)                      | 2<br>(0.4) | 0<br>(0.0) | 0<br>(0.0) | 0<br>(0.0) | 10<br>(1.8)                     | 0<br>(0.0)  | 0<br>(0.0) | 0<br>(0.0) | 0<br>(0.0) | 7<br>(1.2)                            | 2<br>(0.4)  | 0<br>(0.0) | 0<br>(0.0) | 0<br>(0.0) |
| Gallbladder obstruction   | 0<br>(0.0)                      | 0<br>(0.0) | 0<br>(0.0) | 0<br>(0.0) | 0<br>(0.0) | 0<br>(0.0)                      | 0<br>(0.0)  | 0<br>(0.0) | 0<br>(0.0) | 0<br>(0.0) | 1<br>(0.2)                            | 0<br>(0.0)  | 0<br>(0.0) | 0<br>(0.0) | 0<br>(0.0) |
| Gastric ulcer             | 0<br>(0.0)                      | 0<br>(0.0) | 0<br>(0.0) | 0<br>(0.0) | 0<br>(0.0) | 0<br>(0.0)                      | 1<br>(0.2)  | 0<br>(0.0) | 0<br>(0.0) | 0<br>(0.0) | 0<br>(0.0)                            | 0<br>(0.0)  | 0<br>(0.0) | 0<br>(0.0) | 0<br>(0.0) |
| Gastritis                 | 0<br>(0.0)                      | 0<br>(0.0) | 0<br>(0.0) | 0<br>(0.0) | 0<br>(0.0) | 0<br>(0.0)                      | 0<br>(0.0)  | 0<br>(0.0) | 0<br>(0.0) | 0<br>(0.0) | 1<br>(0.2)                            | 0<br>(0.0)  | 0<br>(0.0) | 0<br>(0.0) | 0<br>(0.0) |
| Gastrointestinal disorder | 20<br>(3.7)                     | 9<br>(1.7) | 1<br>(0.2) | 0<br>(0.0) | 0<br>(0.0) | 29<br>(5.2)                     | 5<br>(0.9)  | 0<br>(0.0) | 0<br>(0.0) | 0<br>(0.0) | 18<br>(3.2)                           | 3<br>(0.5)  | 1<br>(0.2) | 0<br>(0.0) | 0<br>(0.0) |
| Hemorrhoids               | 16<br>(2.9)                     | 8<br>(1.5) | 0<br>(0.0) | 0<br>(0.0) | 0<br>(0.0) | 17<br>(3.0)                     | 6<br>(1.1)  | 0<br>(0.0) | 0<br>(0.0) | 0<br>(0.0) | 22<br>(3.9)                           | 3<br>(0.5)  | 1<br>(0.2) | 0<br>(0.0) | 0<br>(0.0) |
| Ileal obstruction         | 0<br>(0.0)                      | 0<br>(0.0) | 0<br>(0.0) | 0<br>(0.0) | 0<br>(0.0) | 0<br>(0.0)                      | 0<br>(0.0)  | 1<br>(0.2) | 0<br>(0.0) | 0<br>(0.0) | 0<br>(0.0)                            | 0<br>(0.0)  | 0<br>(0.0) | 0<br>(0.0) | 0<br>(0.0) |
| Ileus                     | 0<br>(0.0)                      | 1<br>(0.2) | 0<br>(0.0) | 0<br>(0.0) | 0<br>(0.0) | 0<br>(0.0)                      | 0<br>(0.0)  | 0<br>(0.0) | 0<br>(0.0) | 0<br>(0.0) | 0<br>(0.0)                            | 0<br>(0.0)  | 0<br>(0.0) | 0<br>(0.0) | 0<br>(0.0) |
| Jejunal obstruction       | 0                               | 0          | 0          | 0          | 0          | 0                               | 0           | 0          | 0          | 0          | 0                                     | 0           | 1          | 0          | 0          |

**Supplementary Table S10: Late\* Adverse Events without Regard to Attribution**  
**Adverse Event Categories of Interest**  
**Distribution of Patients by Highest Grade Adverse Event and by Specific Adverse Event Term**

| Category/Term                | PBRT Alone (n=545) <sup>a</sup> |        |       |       |       | PBRT+STADT (n=559) <sup>b</sup> |        |       |       |       | PLNRT+PBRT+STADT (n=562) <sup>c</sup> |        |       |       |       |
|------------------------------|---------------------------------|--------|-------|-------|-------|---------------------------------|--------|-------|-------|-------|---------------------------------------|--------|-------|-------|-------|
|                              | n and (%) of Patients by Grade  |        |       |       |       | n and (%) of Patients by Grade  |        |       |       |       | n and (%) of Patients by Grade        |        |       |       |       |
|                              | 1                               | 2      | 3     | 4     | 5     | 1                               | 2      | 3     | 4     | 5     | 1                                     | 2      | 3     | 4     | 5     |
| Mucositis oral               | (0.0)                           | (0.0)  | (0.0) | (0.0) | (0.0) | (0.0)                           | (0.0)  | (0.0) | (0.0) | (0.0) | (0.0)                                 | (0.0)  | (0.2) | (0.0) | (0.0) |
|                              | 1                               | 0      | 0     | 0     | 0     | 1                               | 0      | 0     | 0     | 0     | 0                                     | 0      | 0     | 0     | 0     |
|                              | (0.2)                           | (0.0)  | (0.0) | (0.0) | (0.0) | (0.2)                           | (0.0)  | (0.0) | (0.0) | (0.0) | (0.0)                                 | (0.0)  | (0.0) | (0.0) | (0.0) |
| Nausea                       | 7                               | 1      | 1     | 0     | 0     | 11                              | 3      | 0     | 0     | 0     | 11                                    | 1      | 0     | 0     | 0     |
|                              | (1.3)                           | (0.2)  | (0.2) | (0.0) | (0.0) | (2.0)                           | (0.5)  | (0.0) | (0.0) | (0.0) | (2.0)                                 | (0.2)  | (0.0) | (0.0) | (0.0) |
|                              | (4.4)                           | (2.9)  | (0.2) | (0.0) | (0.0) | (5.4)                           | (3.0)  | (0.2) | (0.0) | (0.0) | (4.6)                                 | (3.2)  | (0.0) | (0.0) | (0.0) |
| Proctitis                    | 24                              | 16     | 1     | 0     | 0     | 30                              | 17     | 1     | 0     | 0     | 26                                    | 18     | 0     | 0     | 0     |
|                              | (4.4)                           | (2.9)  | (0.2) | (0.0) | (0.0) | (5.4)                           | (3.0)  | (0.2) | (0.0) | (0.0) | (4.6)                                 | (3.2)  | (0.0) | (0.0) | (0.0) |
| Proctoscopy abnormal         | 0                               | 0      | 0     | 0     | 0     | 1                               | 0      | 0     | 0     | 0     | 0                                     | 0      | 0     | 0     | 0     |
|                              | (0.0)                           | (0.0)  | (0.0) | (0.0) | (0.0) | (0.2)                           | (0.0)  | (0.0) | (0.0) | (0.0) | (0.0)                                 | (0.0)  | (0.0) | (0.0) | (0.0) |
| Rectal anastomotic leak      | 1                               | 0      | 0     | 0     | 0     | 0                               | 0      | 0     | 0     | 0     | 0                                     | 0      | 0     | 0     | 0     |
|                              | (0.2)                           | (0.0)  | (0.0) | (0.0) | (0.0) | (0.0)                           | (0.0)  | (0.0) | (0.0) | (0.0) | (0.0)                                 | (0.0)  | (0.0) | (0.0) | (0.0) |
| Rectal mucositis             | 0                               | 0      | 0     | 0     | 0     | 0                               | 0      | 0     | 0     | 0     | 1                                     | 0      | 0     | 0     | 0     |
|                              | (0.0)                           | (0.0)  | (0.0) | (0.0) | (0.0) | (0.0)                           | (0.0)  | (0.0) | (0.0) | (0.0) | (0.2)                                 | (0.0)  | (0.0) | (0.0) | (0.0) |
| Rectal stenosis              | 0                               | 1      | 0     | 0     | 0     | 0                               | 0      | 0     | 0     | 0     | 0                                     | 0      | 0     | 0     | 0     |
|                              | (0.0)                           | (0.2)  | (0.0) | (0.0) | (0.0) | (0.0)                           | (0.0)  | (0.0) | (0.0) | (0.0) | (0.0)                                 | (0.0)  | (0.0) | (0.0) | (0.0) |
| Small intestinal obstruction | 0                               | 0      | 0     | 0     | 0     | 0                               | 0      | 0     | 0     | 0     | 0                                     | 0      | 3     | 0     | 0     |
|                              | (0.0)                           | (0.0)  | (0.0) | (0.0) | (0.0) | (0.0)                           | (0.0)  | (0.0) | (0.0) | (0.0) | (0.0)                                 | (0.0)  | (0.5) | (0.0) | (0.0) |
| Taste alteration             | 2                               | 1      | 0     | 0     | 0     | 0                               | 0      | 0     | 0     | 0     | 0                                     | 0      | 0     | 0     | 0     |
|                              | (0.4)                           | (0.2)  | (0.0) | (0.0) | (0.0) | (0.0)                           | (0.0)  | (0.0) | (0.0) | (0.0) | (0.0)                                 | (0.0)  | (0.0) | (0.0) | (0.0) |
| Tooth disorder               | 0                               | 0      | 0     | 0     | 0     | 0                               | 0      | 0     | 0     | 0     | 0                                     | 1      | 0     | 0     | 0     |
|                              | (0.0)                           | (0.0)  | (0.0) | (0.0) | (0.0) | (0.0)                           | (0.0)  | (0.0) | (0.0) | (0.0) | (0.0)                                 | (0.2)  | (0.0) | (0.0) | (0.0) |
| Vomiting                     | 1                               | 1      | 0     | 0     | 0     | 2                               | 2      | 0     | 0     | 0     | 2                                     | 0      | 0     | 0     | 0     |
|                              | (0.2)                           | (0.2)  | (0.0) | (0.0) | (0.0) | (0.4)                           | (0.4)  | (0.0) | (0.0) | (0.0) | (0.4)                                 | (0.0)  | (0.0) | (0.0) | (0.0) |
| RENAL/GENITOURINARY          | 148                             | 173    | 26    | 3     | 0     | 165                             | 157    | 30    | 7     | 0     | 138                                   | 178    | 42    | 3     | 0     |
|                              | (27.2)                          | (31.7) | (4.8) | (0.6) | (0.0) | (29.5)                          | (28.1) | (5.4) | (1.3) | (0.0) | (24.6)                                | (31.7) | (7.5) | (0.5) | (0.0) |
| Bladder anastomotic leak     | 1                               | 0      | 0     | 0     | 0     | 1                               | 0      | 0     | 0     | 0     | 1                                     | 0      | 0     | 0     | 0     |
|                              | (0.2)                           | (0.0)  | (0.0) | (0.0) | (0.0) | (0.2)                           | (0.0)  | (0.0) | (0.0) | (0.0) | (0.2)                                 | (0.0)  | (0.0) | (0.0) | (0.0) |
| Bladder obstruction          | 0                               | 3      | 1     | 0     | 0     | 0                               | 1      | 3     | 0     | 0     | 2                                     | 1      | 0     | 0     | 0     |
|                              | (0.0)                           | (0.6)  | (0.2) | (0.0) | (0.0) | (0.0)                           | (0.2)  | (0.5) | (0.0) | (0.0) | (0.4)                                 | (0.2)  | (0.0) | (0.0) | (0.0) |
| Bladder perforation          | 0                               | 0      | 1     | 0     | 0     | 0                               | 0      | 0     | 0     | 0     | 0                                     | 0      | 0     | 0     | 0     |
|                              | (0.0)                           | (0.0)  | (0.2) | (0.0) | (0.0) | (0.0)                           | (0.0)  | (0.0) | (0.0) | (0.0) | (0.0)                                 | (0.0)  | (0.0) | (0.0) | (0.0) |
| Bladder spasm                | 3                               | 4      | 0     | 0     | 0     | 3                               | 4      | 0     | 1     | 0     | 3                                     | 1      | 0     | 0     | 0     |
|                              | (0.6)                           | (0.7)  | (0.0) | (0.0) | (0.0) | (0.5)                           | (0.7)  | (0.0) | (0.2) | (0.0) | (0.5)                                 | (0.2)  | (0.0) | (0.0) | (0.0) |
| Bladder stenosis             | 0                               | 3      | 2     | 0     | 0     | 0                               | 3      | 0     | 0     | 0     | 0                                     | 2      | 0     | 1     | 0     |
|                              | (0.0)                           | (0.6)  | (0.4) | (0.0) | (0.0) | (0.0)                           | (0.5)  | (0.0) | (0.0) | (0.0) | (0.0)                                 | (0.4)  | (0.0) | (0.2) | (0.0) |



**Supplementary Table S10: Late\* Adverse Events without Regard to Attribution**  
**Adverse Event Categories of Interest**  
**Distribution of Patients by Highest Grade Adverse Event and by Specific Adverse Event Term**

| Category/Term             | PBRT Alone (n=545) <sup>a</sup> |               |            |            |            | PBRT+STADT (n=559) <sup>b</sup> |              |             |            |            | PLNRT+PBRT+STADT (n=562) <sup>c</sup> |               |             |            |            |
|---------------------------|---------------------------------|---------------|------------|------------|------------|---------------------------------|--------------|-------------|------------|------------|---------------------------------------|---------------|-------------|------------|------------|
|                           | n and (%) of Patients by Grade  |               |            |            |            | n and (%) of Patients by Grade  |              |             |            |            | n and (%) of Patients by Grade        |               |             |            |            |
|                           | 1                               | 2             | 3          | 4          | 5          | 1                               | 2            | 3           | 4          | 5          | 1                                     | 2             | 3           | 4          | 5          |
| Cystitis                  | 18<br>(3.3)                     | 39<br>(7.2)   | 5<br>(0.9) | 1<br>(0.2) | 0<br>(0.0) | 20<br>(3.6)                     | 45<br>(8.1)  | 8<br>(1.4)  | 0<br>(0.0) | 0<br>(0.0) | 12<br>(2.1)                           | 46<br>(8.2)   | 12<br>(2.1) | 0<br>(0.0) | 0<br>(0.0) |
| Kidney perforation        | 0<br>(0.0)                      | 0<br>(0.0)    | 0<br>(0.0) | 0<br>(0.0) | 0<br>(0.0) | 0<br>(0.0)                      | 0<br>(0.0)   | 0<br>(0.0)  | 0<br>(0.0) | 0<br>(0.0) | 0<br>(0.0)                            | 0<br>(0.0)    | 1<br>(0.2)  | 0<br>(0.0) | 0<br>(0.0) |
| Prostatic obstruction     | 0<br>(0.0)                      | 0<br>(0.0)    | 0<br>(0.0) | 0<br>(0.0) | 0<br>(0.0) | 1<br>(0.2)                      | 0<br>(0.0)   | 0<br>(0.0)  | 0<br>(0.0) | 0<br>(0.0) | 0<br>(0.0)                            | 0<br>(0.0)    | 0<br>(0.0)  | 0<br>(0.0) | 0<br>(0.0) |
| Ureteric obstruction      | 3<br>(0.6)                      | 1<br>(0.2)    | 0<br>(0.0) | 0<br>(0.0) | 0<br>(0.0) | 2<br>(0.4)                      | 4<br>(0.7)   | 2<br>(0.4)  | 0<br>(0.0) | 0<br>(0.0) | 1<br>(0.2)                            | 3<br>(0.5)    | 2<br>(0.4)  | 0<br>(0.0) | 0<br>(0.0) |
| Ureteric stenosis         | 0<br>(0.0)                      | 0<br>(0.0)    | 0<br>(0.0) | 0<br>(0.0) | 0<br>(0.0) | 0<br>(0.0)                      | 0<br>(0.0)   | 2<br>(0.4)  | 0<br>(0.0) | 0<br>(0.0) | 0<br>(0.0)                            | 2<br>(0.4)    | 0<br>(0.0)  | 0<br>(0.0) | 0<br>(0.0) |
| Urethral anastomotic leak | 0<br>(0.0)                      | 0<br>(0.0)    | 0<br>(0.0) | 0<br>(0.0) | 0<br>(0.0) | 0<br>(0.0)                      | 0<br>(0.0)   | 0<br>(0.0)  | 0<br>(0.0) | 0<br>(0.0) | 0<br>(0.0)                            | 1<br>(0.2)    | 0<br>(0.0)  | 0<br>(0.0) | 0<br>(0.0) |
| Urethral fistula          | 0<br>(0.0)                      | 0<br>(0.0)    | 1<br>(0.2) | 0<br>(0.0) | 0<br>(0.0) | 0<br>(0.0)                      | 0<br>(0.0)   | 0<br>(0.0)  | 1<br>(0.2) | 0<br>(0.0) | 0<br>(0.0)                            | 0<br>(0.0)    | 0<br>(0.0)  | 0<br>(0.0) | 0<br>(0.0) |
| Urethral obstruction      | 1<br>(0.2)                      | 4<br>(0.7)    | 1<br>(0.2) | 0<br>(0.0) | 0<br>(0.0) | 1<br>(0.2)                      | 7<br>(1.3)   | 2<br>(0.4)  | 0<br>(0.0) | 0<br>(0.0) | 5<br>(0.9)                            | 1<br>(0.2)    | 0<br>(0.0)  | 0<br>(0.0) | 0<br>(0.0) |
| Urethral stricture        | 1<br>(0.2)                      | 8<br>(1.5)    | 3<br>(0.6) | 0<br>(0.0) | 0<br>(0.0) | 2<br>(0.4)                      | 5<br>(0.9)   | 3<br>(0.5)  | 0<br>(0.0) | 0<br>(0.0) | 0<br>(0.0)                            | 6<br>(1.1)    | 0<br>(0.0)  | 0<br>(0.0) | 0<br>(0.0) |
| Urinary frequency         | 162<br>(29.7)                   | 81<br>(14.9)  | 4<br>(0.7) | 0<br>(0.0) | 0<br>(0.0) | 186<br>(33.3)                   | 89<br>(15.9) | 2<br>(0.4)  | 0<br>(0.0) | 0<br>(0.0) | 183<br>(32.6)                         | 96<br>(17.1)  | 3<br>(0.5)  | 0<br>(0.0) | 0<br>(0.0) |
| Urinary incontinence      | 109<br>(20.0)                   | 116<br>(21.3) | 9<br>(1.7) | 2<br>(0.4) | 0<br>(0.0) | 103<br>(18.4)                   | 90<br>(16.1) | 12<br>(2.1) | 4<br>(0.7) | 0<br>(0.0) | 96<br>(17.1)                          | 111<br>(19.8) | 23<br>(4.1) | 2<br>(0.4) | 0<br>(0.0) |
| Urinary retention         | 45<br>(8.3)                     | 22<br>(4.0)   | 1<br>(0.2) | 1<br>(0.2) | 0<br>(0.0) | 47<br>(8.4)                     | 15<br>(2.7)  | 2<br>(0.4)  | 0<br>(0.0) | 0<br>(0.0) | 57<br>(10.1)                          | 16<br>(2.8)   | 2<br>(0.4)  | 0<br>(0.0) | 0<br>(0.0) |
| Urine discoloration       | 3<br>(0.6)                      | 0<br>(0.0)    | 0<br>(0.0) | 0<br>(0.0) | 0<br>(0.0) | 5<br>(0.9)                      | 0<br>(0.0)   | 0<br>(0.0)  | 0<br>(0.0) | 0<br>(0.0) | 5<br>(0.9)                            | 0<br>(0.0)    | 0<br>(0.0)  | 0<br>(0.0) | 0<br>(0.0) |
| Urogenital disorder       | 52<br>(9.5)                     | 13<br>(2.4)   | 7<br>(1.3) | 1<br>(0.2) | 0<br>(0.0) | 43<br>(7.7)                     | 12<br>(2.1)  | 4<br>(0.7)  | 1<br>(0.2) | 0<br>(0.0) | 40<br>(7.1)                           | 11<br>(2.0)   | 9<br>(1.6)  | 0<br>(0.0) | 0<br>(0.0) |

Adverse events were graded with CTCAE version 3.0.

\*Late: > 90 days after End of Radiation Therapy

†19, 19, and 12 patients from PBRT Alone, PBRT+STADT, and PLNRT+PBRT+STADT arms, respectively, who received no treatment or for whom no late AE information was provided are excluded.

**Supplementary Table S11: All Reported Adverse Events without Regard to Attribution  
Distribution of Patients by Highest Grade Adverse Event and by Category (System Organ Class)**

| Category                    | PBRT Alone (n=547)†            |               |              |            |            | PBRT+STADT (n=563)†            |               |               |             |            | PLNRT+PBRT+STADT (n=563)†      |               |               |             |            |
|-----------------------------|--------------------------------|---------------|--------------|------------|------------|--------------------------------|---------------|---------------|-------------|------------|--------------------------------|---------------|---------------|-------------|------------|
|                             | n and (%) of Patients by Grade |               |              |            |            | n and (%) of Patients by Grade |               |               |             |            | n and (%) of Patients by Grade |               |               |             |            |
|                             | 1                              | 2             | 3            | 4          | 5          | 1                              | 2             | 3             | 4           | 5          | 1                              | 2             | 3             | 4           | 5          |
| Overall Highest Grade       | 110<br>(20.1)                  | 257<br>(47.0) | 70<br>(12.8) | 9<br>(1.6) | 0<br>(0.0) | 120<br>(21.3)                  | 273<br>(48.5) | 100<br>(17.8) | 15<br>(2.7) | 0<br>(0.0) | 96<br>(17.1)                   | 275<br>(48.8) | 131<br>(23.3) | 14<br>(2.5) | 0<br>(0.0) |
| Allergy/immunology          | 0<br>(0.0)                     | 1<br>(0.2)    | 0<br>(0.0)   | 0<br>(0.0) | 0<br>(0.0) | 1<br>(0.2)                     | 1<br>(0.2)    | 0<br>(0.0)    | 0<br>(0.0)  | 0<br>(0.0) | 1<br>(0.2)                     | 1<br>(0.2)    | 0<br>(0.0)    | 0<br>(0.0)  | 0<br>(0.0) |
| Auditory/ear                | 0<br>(0.0)                     | 3<br>(0.5)    | 0<br>(0.0)   | 0<br>(0.0) | 0<br>(0.0) | 0<br>(0.0)                     | 2<br>(0.4)    | 1<br>(0.2)    | 0<br>(0.0)  | 0<br>(0.0) | 0<br>(0.0)                     | 3<br>(0.5)    | 0<br>(0.0)    | 0<br>(0.0)  | 0<br>(0.0) |
| Blood/bone marrow           | 43<br>(7.9)                    | 23<br>(4.2)   | 4<br>(0.7)   | 2<br>(0.4) | 0<br>(0.0) | 79<br>(14.0)                   | 16<br>(2.8)   | 3<br>(0.5)    | 0<br>(0.0)  | 0<br>(0.0) | 61<br>(10.8)                   | 24<br>(4.3)   | 20<br>(3.6)   | 2<br>(0.4)  | 0<br>(0.0) |
| Cardiac arrhythmia          | 1<br>(0.2)                     | 3<br>(0.5)    | 0<br>(0.0)   | 0<br>(0.0) | 0<br>(0.0) | 4<br>(0.7)                     | 1<br>(0.2)    | 0<br>(0.0)    | 0<br>(0.0)  | 0<br>(0.0) | 2<br>(0.4)                     | 4<br>(0.7)    | 3<br>(0.5)    | 2<br>(0.4)  | 0<br>(0.0) |
| Cardiac general             | 4<br>(0.7)                     | 5<br>(0.9)    | 5<br>(0.9)   | 2<br>(0.4) | 0<br>(0.0) | 6<br>(1.1)                     | 11<br>(2.0)   | 6<br>(1.1)    | 4<br>(0.7)  | 0<br>(0.0) | 3<br>(0.5)                     | 14<br>(2.5)   | 7<br>(1.2)    | 1<br>(0.2)  | 0<br>(0.0) |
| Coagulation                 | 1<br>(0.2)                     | 0<br>(0.0)    | 0<br>(0.0)   | 0<br>(0.0) | 0<br>(0.0) | 1<br>(0.2)                     | 0<br>(0.0)    | 0<br>(0.0)    | 0<br>(0.0)  | 0<br>(0.0) | 0<br>(0.0)                     | 0<br>(0.0)    | 1<br>(0.2)    | 0<br>(0.0)  | 0<br>(0.0) |
| Constitutional symptoms     | 141<br>(25.8)                  | 27<br>(4.9)   | 1<br>(0.2)   | 0<br>(0.0) | 0<br>(0.0) | 186<br>(33.0)                  | 57<br>(10.1)  | 0<br>(0.0)    | 0<br>(0.0)  | 0<br>(0.0) | 170<br>(30.2)                  | 62<br>(11.0)  | 7<br>(1.2)    | 0<br>(0.0)  | 0<br>(0.0) |
| Dermatology/skin            | 30<br>(5.5)                    | 9<br>(1.6)    | 1<br>(0.2)   | 0<br>(0.0) | 0<br>(0.0) | 36<br>(6.4)                    | 19<br>(3.4)   | 0<br>(0.0)    | 0<br>(0.0)  | 0<br>(0.0) | 48<br>(8.5)                    | 18<br>(3.2)   | 2<br>(0.4)    | 0<br>(0.0)  | 0<br>(0.0) |
| Endocrine                   | 31<br>(5.7)                    | 11<br>(2.0)   | 2<br>(0.4)   | 0<br>(0.0) | 0<br>(0.0) | 228<br>(40.5)                  | 97<br>(17.2)  | 6<br>(1.1)    | 0<br>(0.0)  | 0<br>(0.0) | 209<br>(37.1)                  | 117<br>(20.8) | 5<br>(0.9)    | 0<br>(0.0)  | 0<br>(0.0) |
| Gastrointestinal            | 160<br>(29.3)                  | 61<br>(11.2)  | 5<br>(0.9)   | 0<br>(0.0) | 0<br>(0.0) | 161<br>(28.6)                  | 64<br>(11.4)  | 10<br>(1.8)   | 0<br>(0.0)  | 0<br>(0.0) | 219<br>(38.9)                  | 70<br>(12.4)  | 12<br>(2.1)   | 0<br>(0.0)  | 0<br>(0.0) |
| Hemorrhage/bleeding         | 61<br>(11.2)                   | 33<br>(6.0)   | 5<br>(0.9)   | 1<br>(0.2) | 0<br>(0.0) | 74<br>(13.1)                   | 25<br>(4.4)   | 4<br>(0.7)    | 0<br>(0.0)  | 0<br>(0.0) | 79<br>(14.0)                   | 31<br>(5.5)   | 8<br>(1.4)    | 0<br>(0.0)  | 0<br>(0.0) |
| Hepatobiliary/pancreas      | 1<br>(0.2)                     | 0<br>(0.0)    | 0<br>(0.0)   | 0<br>(0.0) | 0<br>(0.0) | 1<br>(0.2)                     | 1<br>(0.2)    | 1<br>(0.2)    | 0<br>(0.0)  | 0<br>(0.0) | 0<br>(0.0)                     | 0<br>(0.0)    | 1<br>(0.2)    | 0<br>(0.0)  | 0<br>(0.0) |
| Infection                   | 0<br>(0.0)                     | 19<br>(3.5)   | 5<br>(0.9)   | 1<br>(0.2) | 0<br>(0.0) | 3<br>(0.5)                     | 15<br>(2.7)   | 4<br>(0.7)    | 0<br>(0.0)  | 0<br>(0.0) | 1<br>(0.2)                     | 23<br>(4.1)   | 5<br>(0.9)    | 1<br>(0.2)  | 0<br>(0.0) |
| Lymphatics                  | 6<br>(1.1)                     | 2<br>(0.4)    | 0<br>(0.0)   | 0<br>(0.0) | 0<br>(0.0) | 13<br>(2.3)                    | 4<br>(0.7)    | 1<br>(0.2)    | 0<br>(0.0)  | 0<br>(0.0) | 15<br>(2.7)                    | 0<br>(0.0)    | 1<br>(0.2)    | 0<br>(0.0)  | 0<br>(0.0) |
| Metabolic/laboratory        | 30<br>(5.5)                    | 9<br>(1.6)    | 2<br>(0.4)   | 1<br>(0.2) | 0<br>(0.0) | 57<br>(10.1)                   | 15<br>(2.7)   | 8<br>(1.4)    | 1<br>(0.2)  | 0<br>(0.0) | 54<br>(9.6)                    | 11<br>(2.0)   | 7<br>(1.2)    | 1<br>(0.2)  | 0<br>(0.0) |
| Musculoskeletal/soft tissue | 20<br>(3.7)                    | 4<br>(0.7)    | 2<br>(0.4)   | 0<br>(0.0) | 0<br>(0.0) | 22<br>(3.9)                    | 12<br>(2.1)   | 1<br>(0.2)    | 0<br>(0.0)  | 0<br>(0.0) | 35<br>(6.2)                    | 21<br>(3.7)   | 2<br>(0.4)    | 0<br>(0.0)  | 0<br>(0.0) |
| Neurology                   | 18<br>(3.3)                    | 14<br>(2.6)   | 3<br>(0.5)   | 0<br>(0.0) | 0<br>(0.0) | 37<br>(6.6)                    | 19<br>(3.4)   | 3<br>(0.5)    | 0<br>(0.0)  | 0<br>(0.0) | 60<br>(10.7)                   | 15<br>(2.7)   | 4<br>(0.7)    | 0<br>(0.0)  | 0<br>(0.0) |

**Supplementary Table S11: All Reported Adverse Events without Regard to Attribution  
Distribution of Patients by Highest Grade Adverse Event and by Category (System Organ Class)**

| Category                       | PBRT Alone (n=547) <sup>†</sup> |               |             |            |            | PBRT+STADT (n=563) <sup>†</sup> |               |             |            |            | PLNRT+PBRT+STADT (n=563) <sup>†</sup> |               |             |            |            |
|--------------------------------|---------------------------------|---------------|-------------|------------|------------|---------------------------------|---------------|-------------|------------|------------|---------------------------------------|---------------|-------------|------------|------------|
|                                | n and (%) of Patients by Grade  |               |             |            |            | n and (%) of Patients by Grade  |               |             |            |            | n and (%) of Patients by Grade        |               |             |            |            |
|                                | 1                               | 2             | 3           | 4          | 5          | 1                               | 2             | 3           | 4          | 5          | 1                                     | 2             | 3           | 4          | 5          |
| Ocular/visual                  | 2<br>(0.4)                      | 2<br>(0.4)    | 0<br>(0.0)  | 0<br>(0.0) | 0<br>(0.0) | 5<br>(0.9)                      | 2<br>(0.4)    | 2<br>(0.4)  | 0<br>(0.0) | 0<br>(0.0) | 3<br>(0.5)                            | 2<br>(0.4)    | 2<br>(0.4)  | 0<br>(0.0) | 0<br>(0.0) |
| Pain                           | 85<br>(15.5)                    | 38<br>(6.9)   | 6<br>(1.1)  | 0<br>(0.0) | 0<br>(0.0) | 102<br>(18.1)                   | 42<br>(7.5)   | 9<br>(1.6)  | 0<br>(0.0) | 0<br>(0.0) | 108<br>(19.2)                         | 49<br>(8.7)   | 6<br>(1.1)  | 0<br>(0.0) | 0<br>(0.0) |
| Pulmonary/upper respiratory    | 16<br>(2.9)                     | 8<br>(1.5)    | 1<br>(0.2)  | 0<br>(0.0) | 0<br>(0.0) | 29<br>(5.2)                     | 6<br>(1.1)    | 3<br>(0.5)  | 0<br>(0.0) | 0<br>(0.0) | 18<br>(3.2)                           | 8<br>(1.4)    | 0<br>(0.0)  | 2<br>(0.4) | 0<br>(0.0) |
| Renal/genitourinary            | 158<br>(28.9)                   | 189<br>(34.6) | 29<br>(5.3) | 3<br>(0.5) | 0<br>(0.0) | 189<br>(33.6)                   | 185<br>(32.9) | 31<br>(5.5) | 7<br>(1.2) | 0<br>(0.0) | 169<br>(30.0)                         | 202<br>(35.9) | 44<br>(7.8) | 5<br>(0.9) | 0<br>(0.0) |
| Secondary malignancy           | 0<br>(0.0)                      | 0<br>(0.0)    | 0<br>(0.0)  | 1<br>(0.2) | 0<br>(0.0) | 0<br>(0.0)                      | 0<br>(0.0)    | 1<br>(0.2)  | 2<br>(0.4) | 0<br>(0.0) | 0<br>(0.0)                            | 0<br>(0.0)    | 0<br>(0.0)  | 0<br>(0.0) | 0<br>(0.0) |
| Sexual/reproductive function   | 49<br>(9.0)                     | 102<br>(18.6) | 24<br>(4.4) | 0<br>(0.0) | 0<br>(0.0) | 47<br>(8.3)                     | 130<br>(23.1) | 36<br>(6.4) | 0<br>(0.0) | 0<br>(0.0) | 62<br>(11.0)                          | 133<br>(23.6) | 43<br>(7.6) | 0<br>(0.0) | 0<br>(0.0) |
| Surgery/intra-operative injury | 0<br>(0.0)                      | 0<br>(0.0)    | 1<br>(0.2)  | 0<br>(0.0) | 0<br>(0.0) | 0<br>(0.0)                      | 1<br>(0.2)    | 0<br>(0.0)  | 0<br>(0.0) | 0<br>(0.0) | 0<br>(0.0)                            | 1<br>(0.2)    | 0<br>(0.0)  | 0<br>(0.0) | 0<br>(0.0) |
| Syndromes                      | 1<br>(0.2)                      | 0<br>(0.0)    | 0<br>(0.0)  | 0<br>(0.0) | 0<br>(0.0) | 0<br>(0.0)                      | 1<br>(0.2)    | 0<br>(0.0)  | 0<br>(0.0) | 0<br>(0.0) | 0<br>(0.0)                            | 0<br>(0.0)    | 0<br>(0.0)  | 0<br>(0.0) | 0<br>(0.0) |
| Vascular                       | 2<br>(0.4)                      | 1<br>(0.2)    | 1<br>(0.2)  | 0<br>(0.0) | 0<br>(0.0) | 8<br>(1.4)                      | 3<br>(0.5)    | 2<br>(0.4)  | 2<br>(0.4) | 0<br>(0.0) | 8<br>(1.4)                            | 3<br>(0.5)    | 2<br>(0.4)  | 0<br>(0.0) | 0<br>(0.0) |

Adverse events were graded with CTCAE version 3.0.

<sup>†</sup>17, 15, and 11 patients from PBRT Alone, PBRT+STADT, and PLNRT+PBRT+STADT arms, respectively, who received no treatment or for whom no acute AE information was provided are excluded.

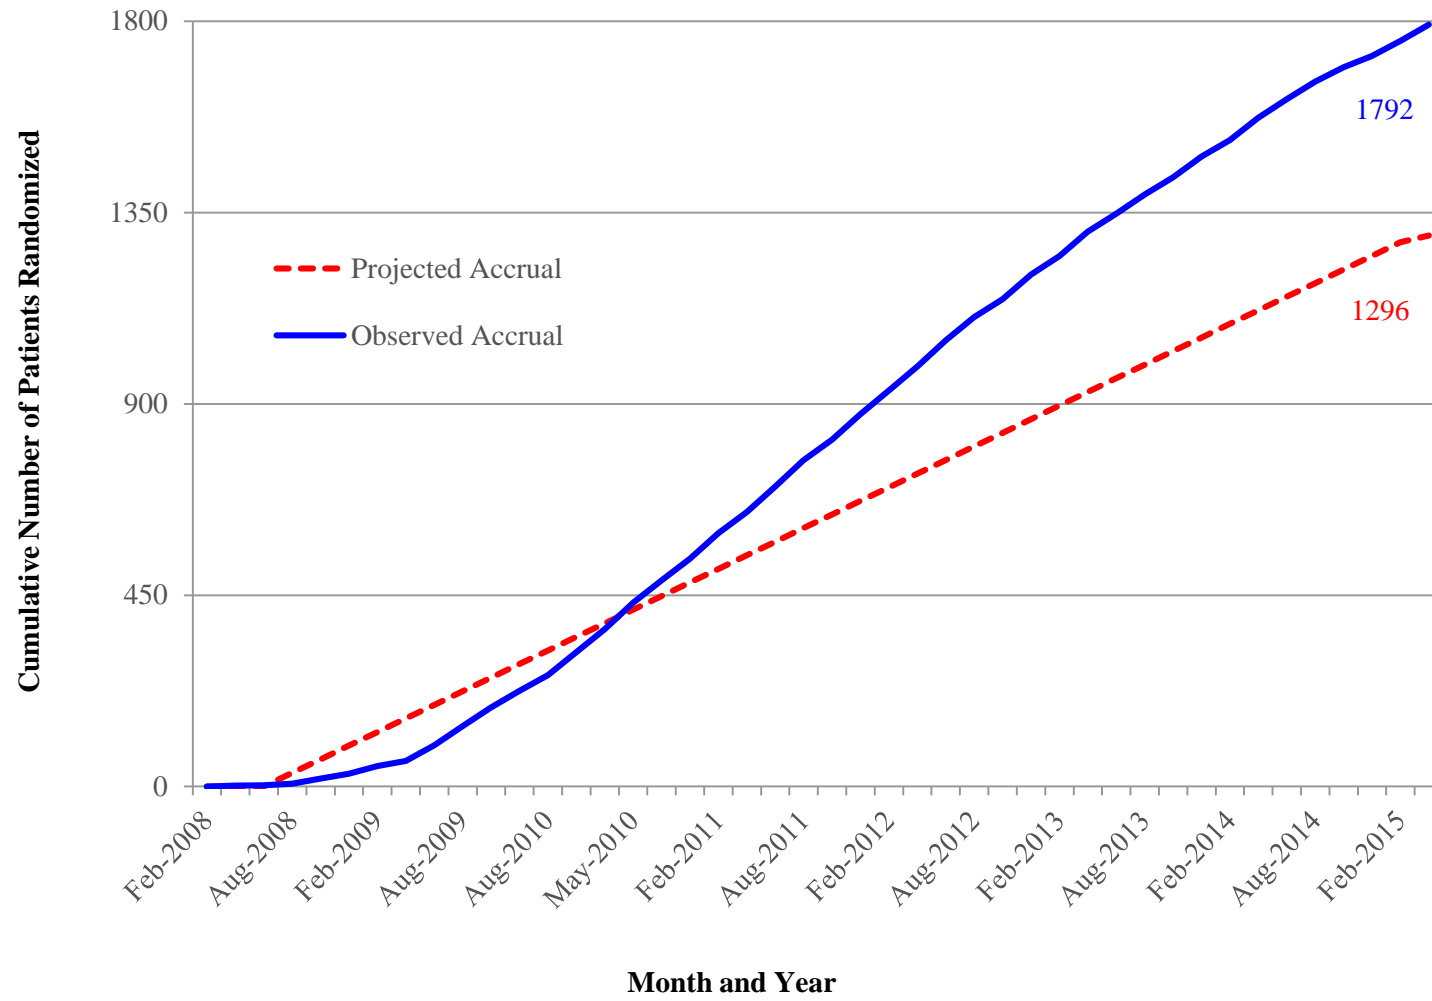

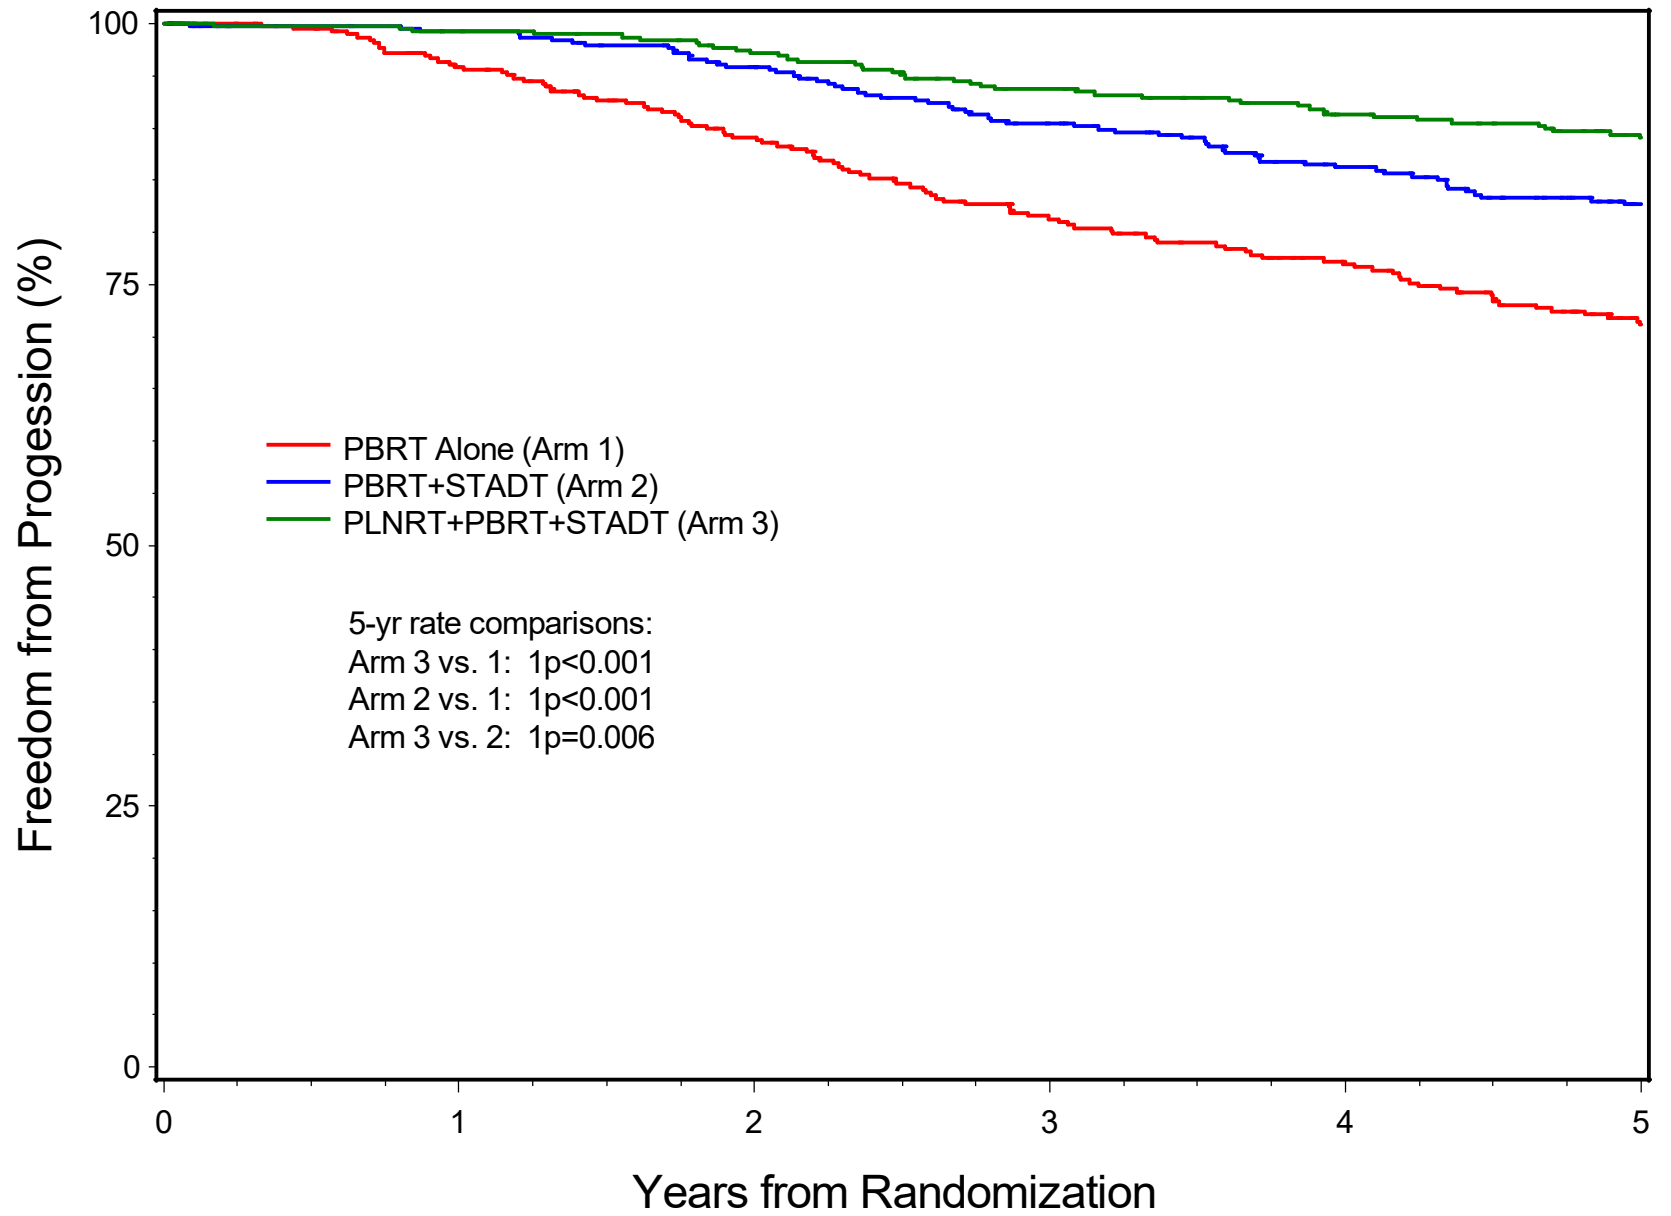

**No. at Risk**

|                  |     |     |     |     |     |     |
|------------------|-----|-----|-----|-----|-----|-----|
| PBRT Alone       | 399 | 363 | 324 | 286 | 259 | 223 |
| PBRT+STADT       | 398 | 381 | 360 | 329 | 299 | 265 |
| PLNRT+PBRT+STADT | 394 | 385 | 371 | 352 | 334 | 311 |

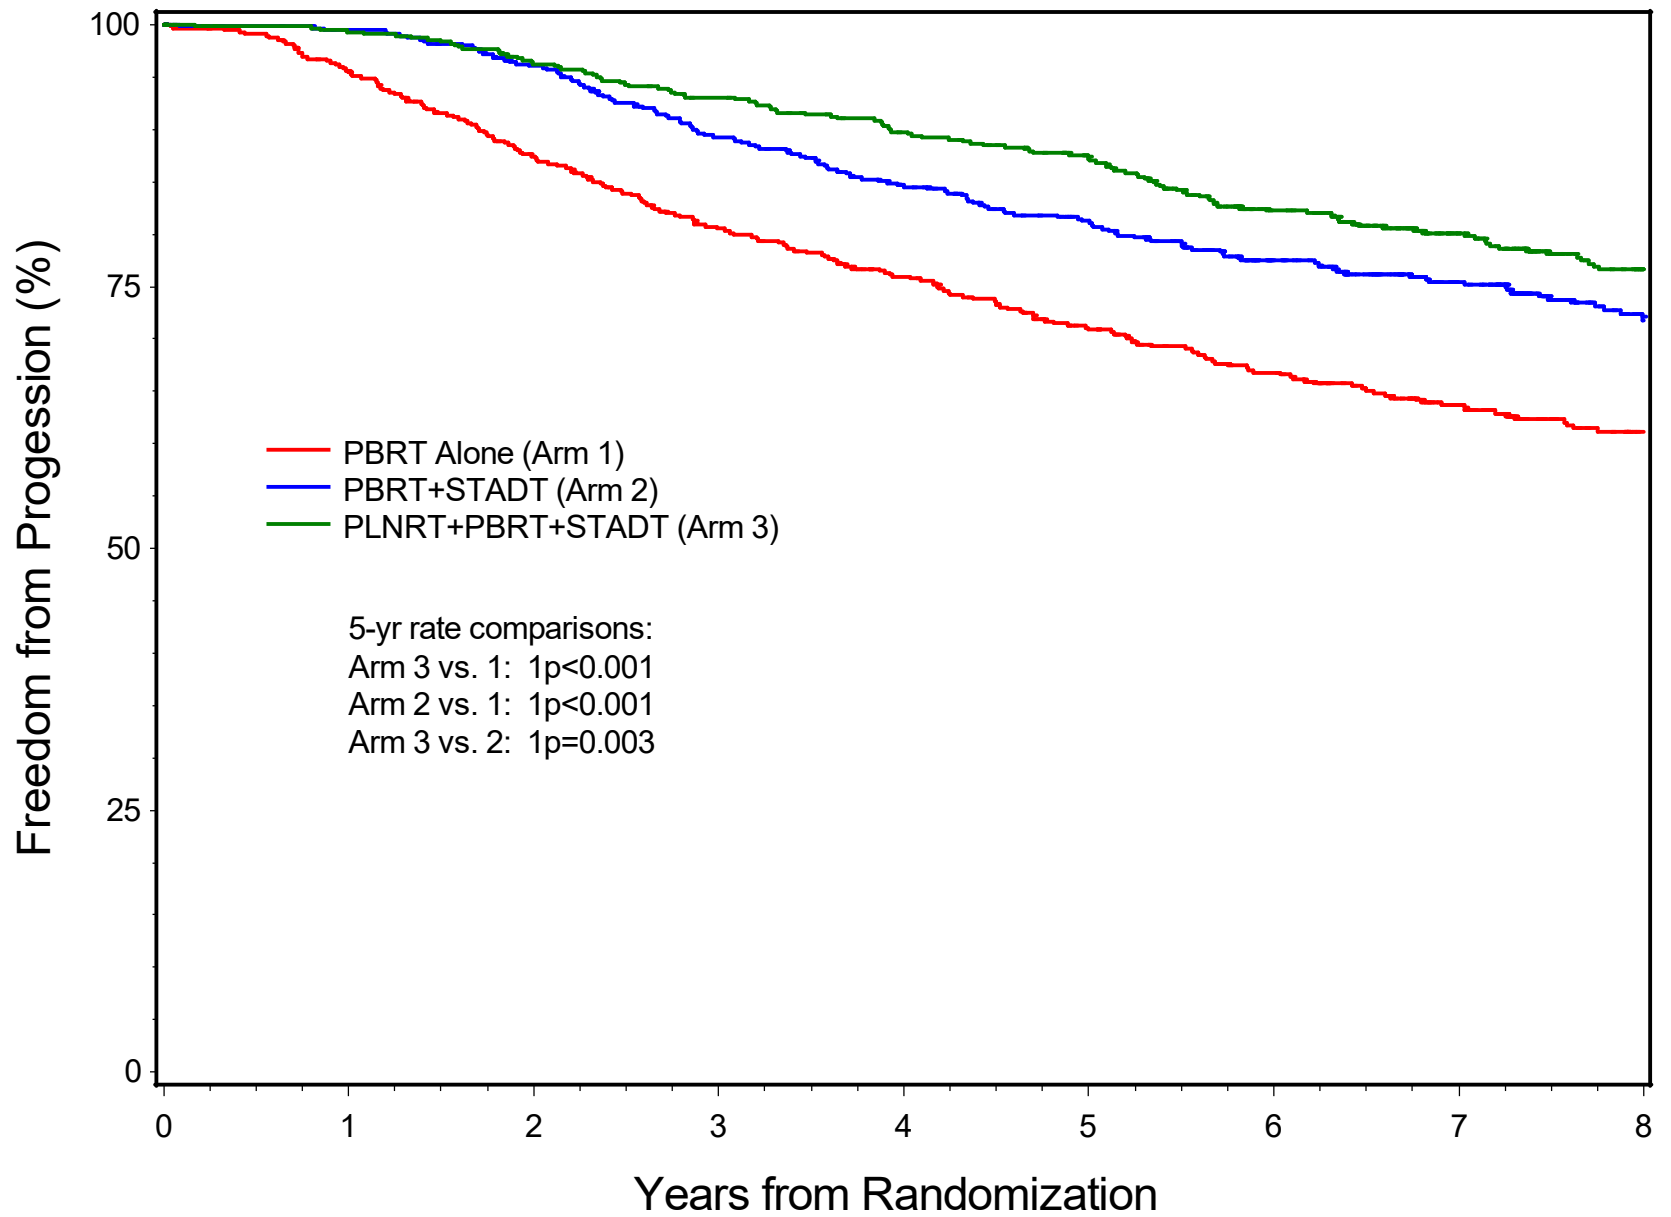

**No. at Risk**

|                  |     |     |     |     |     |     |     |     |     |
|------------------|-----|-----|-----|-----|-----|-----|-----|-----|-----|
| PBRT Alone       | 564 | 517 | 469 | 426 | 393 | 358 | 317 | 257 | 197 |
| PBRT+STADT       | 578 | 555 | 529 | 487 | 453 | 419 | 364 | 294 | 209 |
| PLNRT+PBRT+STADT | 574 | 559 | 538 | 516 | 491 | 466 | 404 | 328 | 254 |

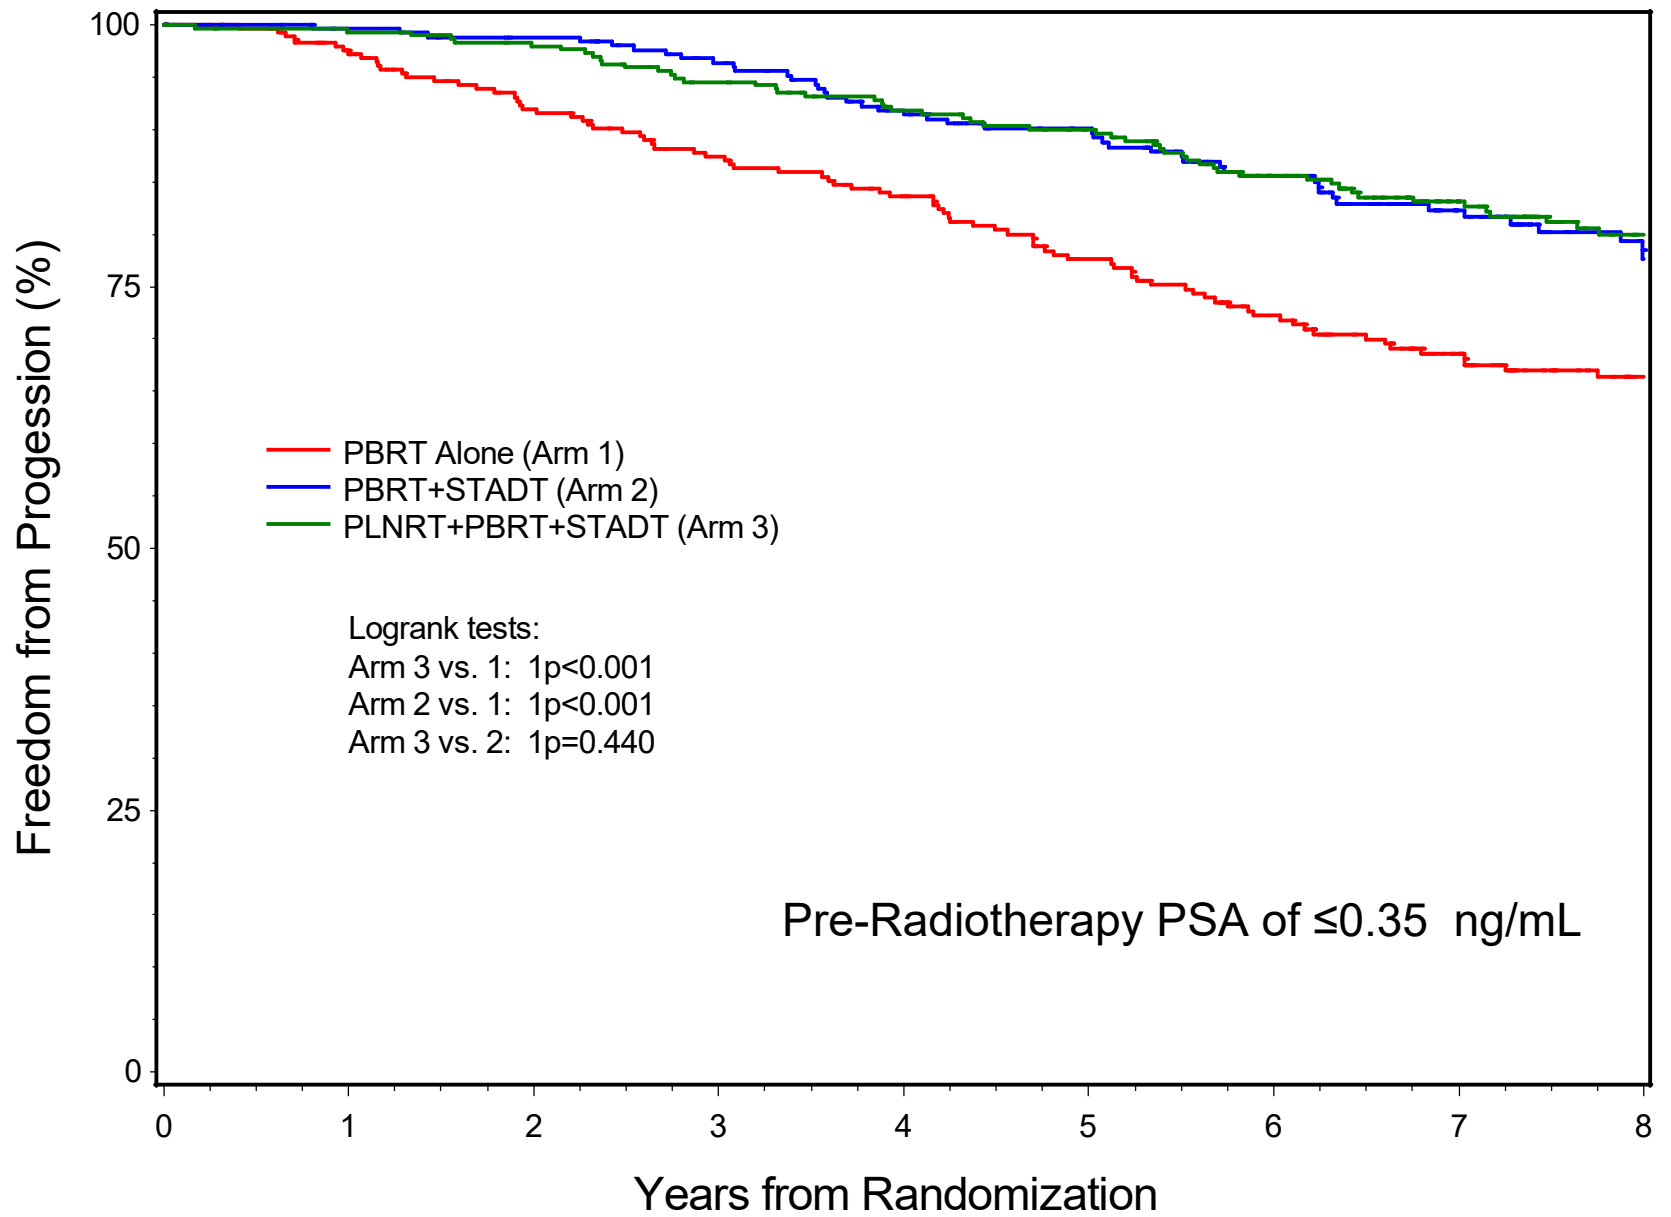

**No. at Risk**

|                  |     |     |     |     |     |     |     |     |     |
|------------------|-----|-----|-----|-----|-----|-----|-----|-----|-----|
| PBRT Alone       | 293 | 268 | 246 | 228 | 213 | 191 | 167 | 134 | 100 |
| PBRT+STADT       | 264 | 252 | 247 | 235 | 217 | 203 | 172 | 129 | 89  |
| PLNRT+PBRT+STADT | 301 | 294 | 288 | 275 | 261 | 250 | 215 | 176 | 133 |

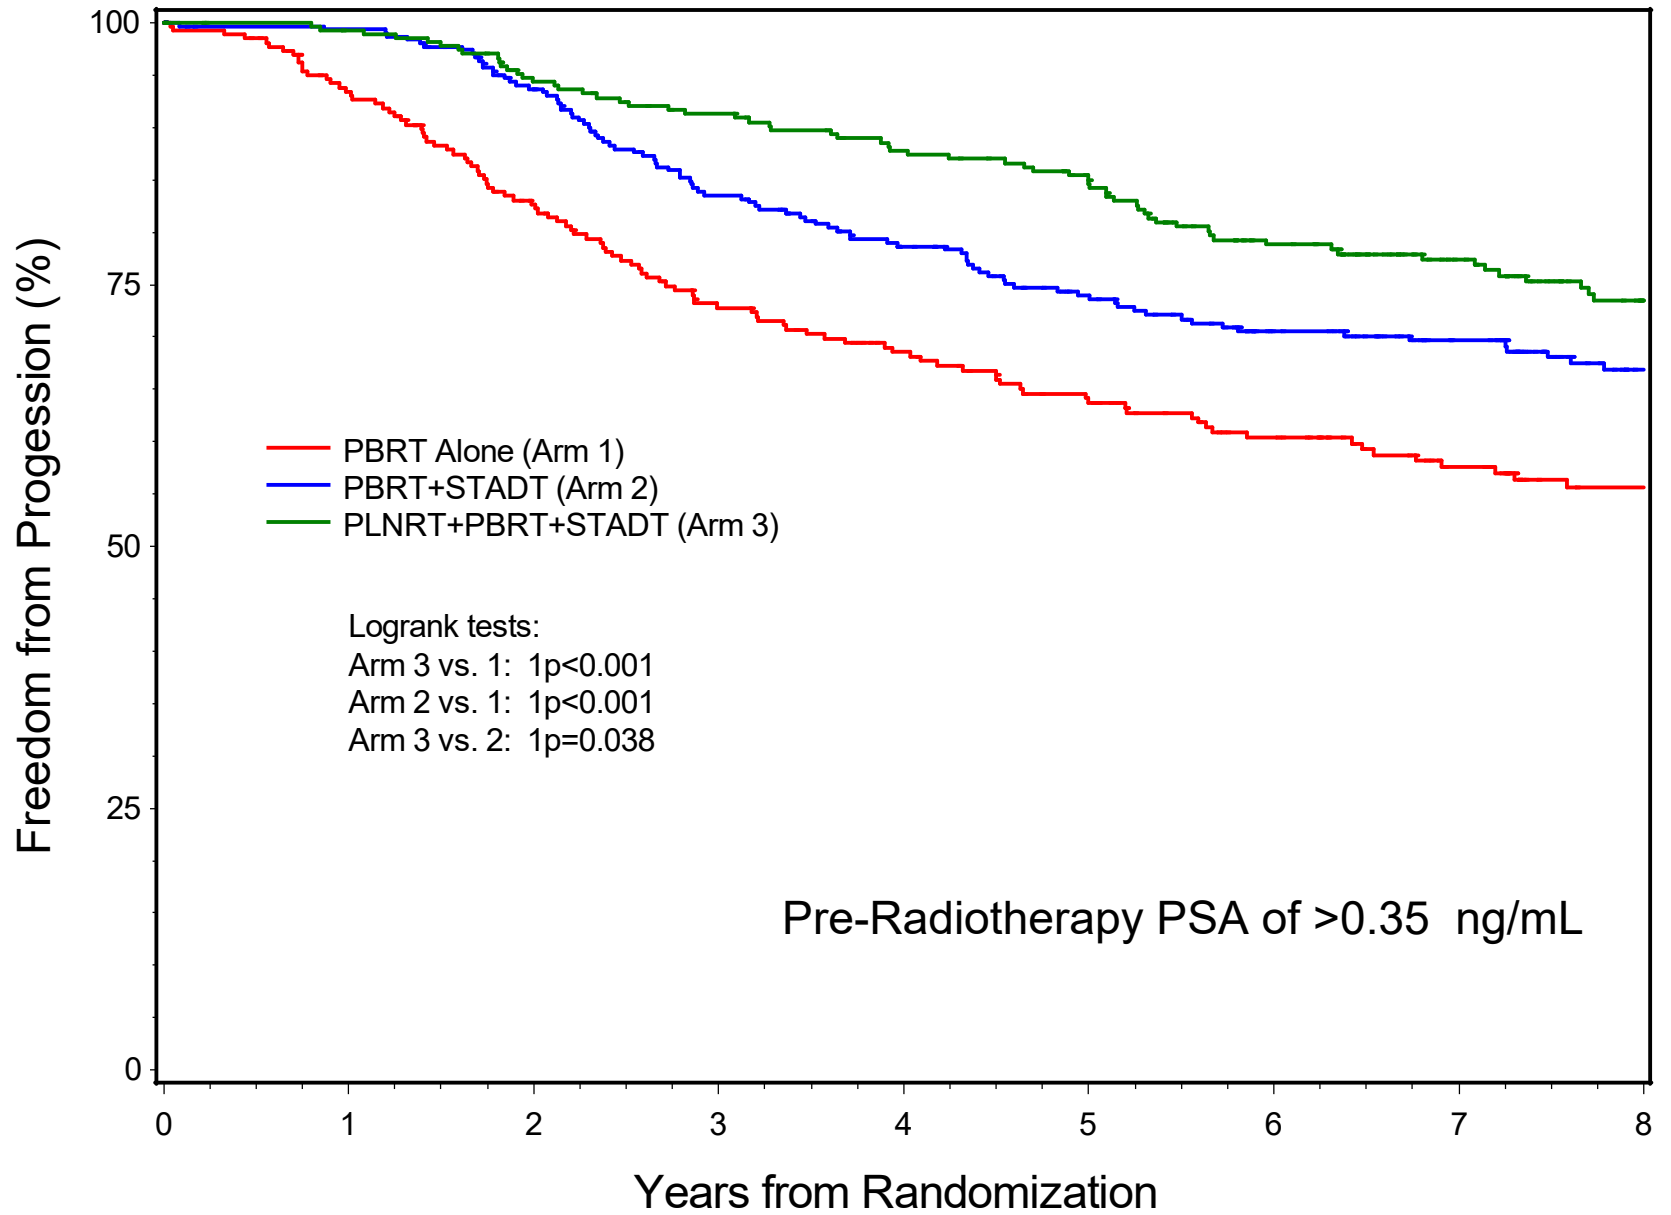

**No. at Risk**

|                  |     |     |     |     |     |     |     |     |     |
|------------------|-----|-----|-----|-----|-----|-----|-----|-----|-----|
| PBRT Alone       | 271 | 238 | 203 | 175 | 158 | 142 | 123 | 100 | 80  |
| PBRT+STADT       | 314 | 303 | 277 | 245 | 223 | 198 | 169 | 144 | 104 |
| PLNRT+PBRT+STADT | 273 | 265 | 248 | 236 | 223 | 209 | 181 | 148 | 117 |



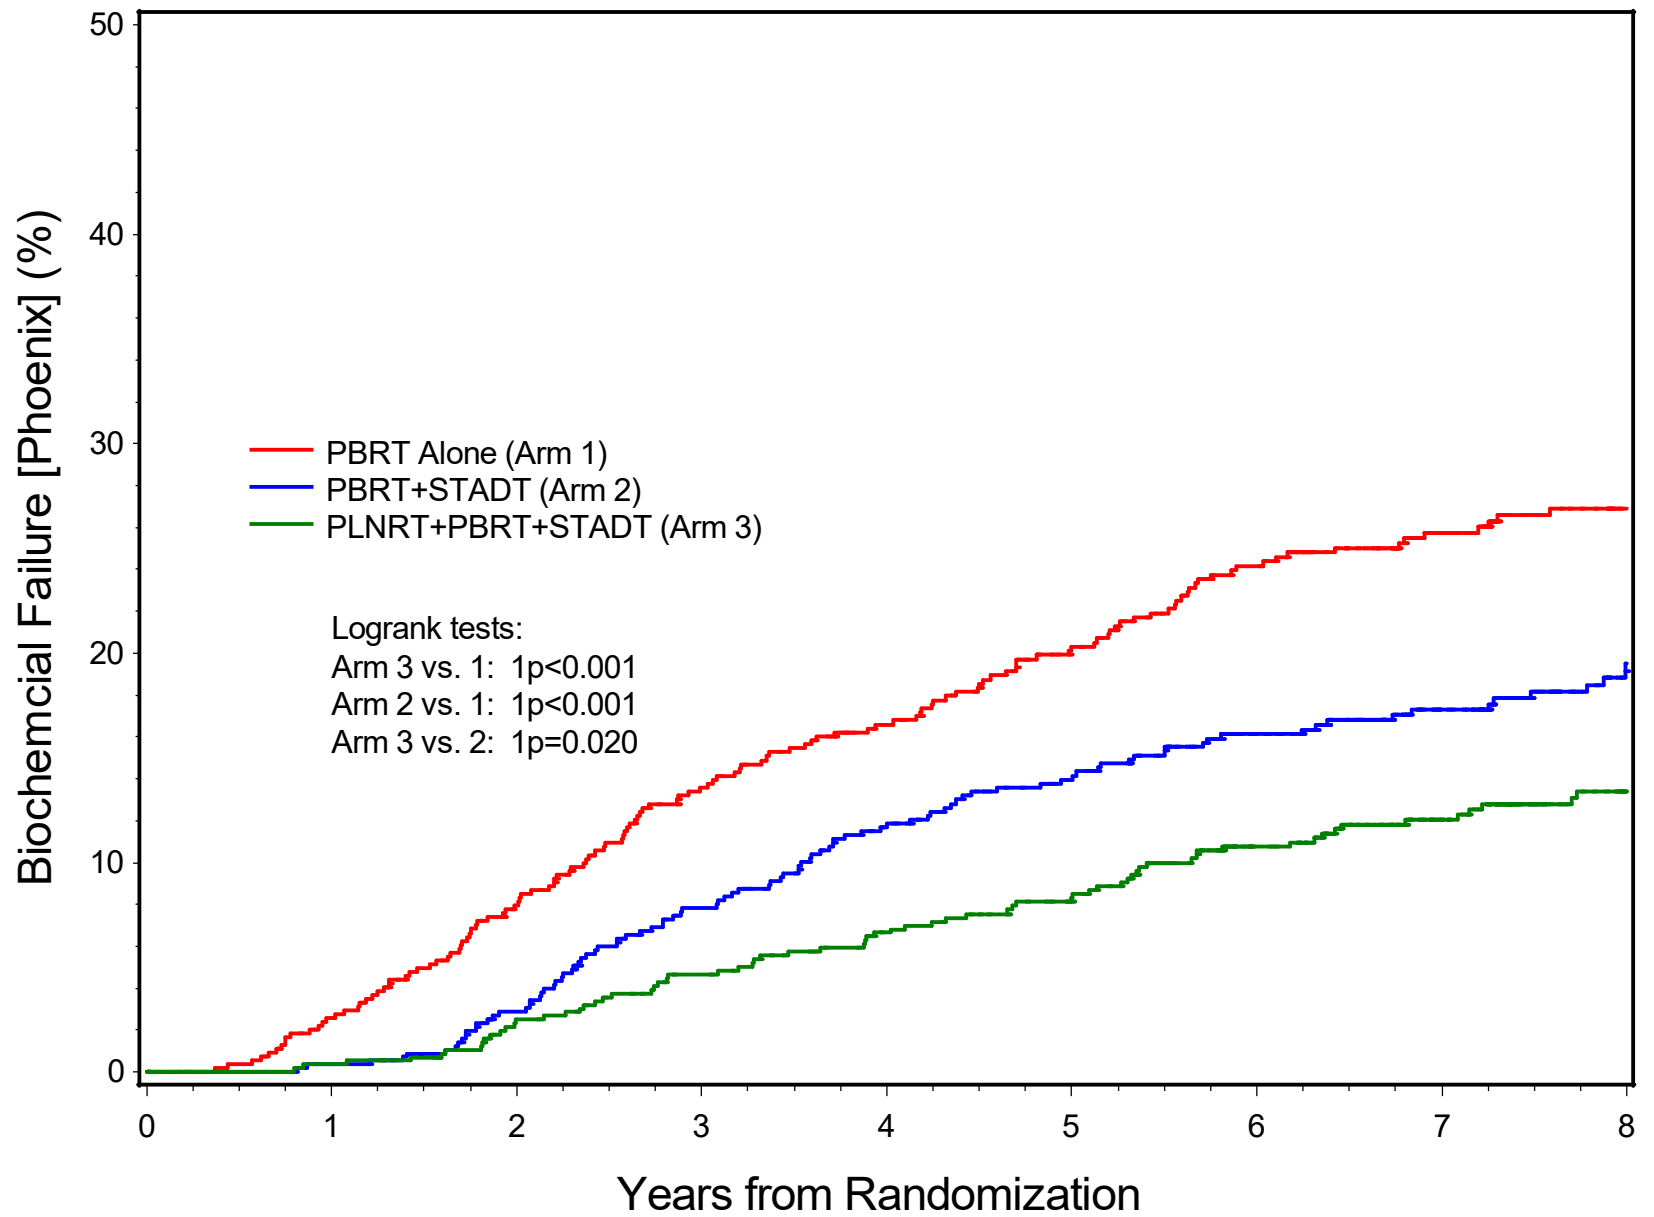

**No. at Risk**

|                  |     |     |     |     |     |     |     |     |     |
|------------------|-----|-----|-----|-----|-----|-----|-----|-----|-----|
| PBRT Alone       | 564 | 526 | 486 | 445 | 415 | 379 | 335 | 267 | 205 |
| PBRT+STADT       | 578 | 556 | 532 | 495 | 462 | 429 | 372 | 298 | 214 |
| PLNRT+PBRT+STADT | 574 | 559 | 539 | 519 | 495 | 473 | 413 | 336 | 258 |

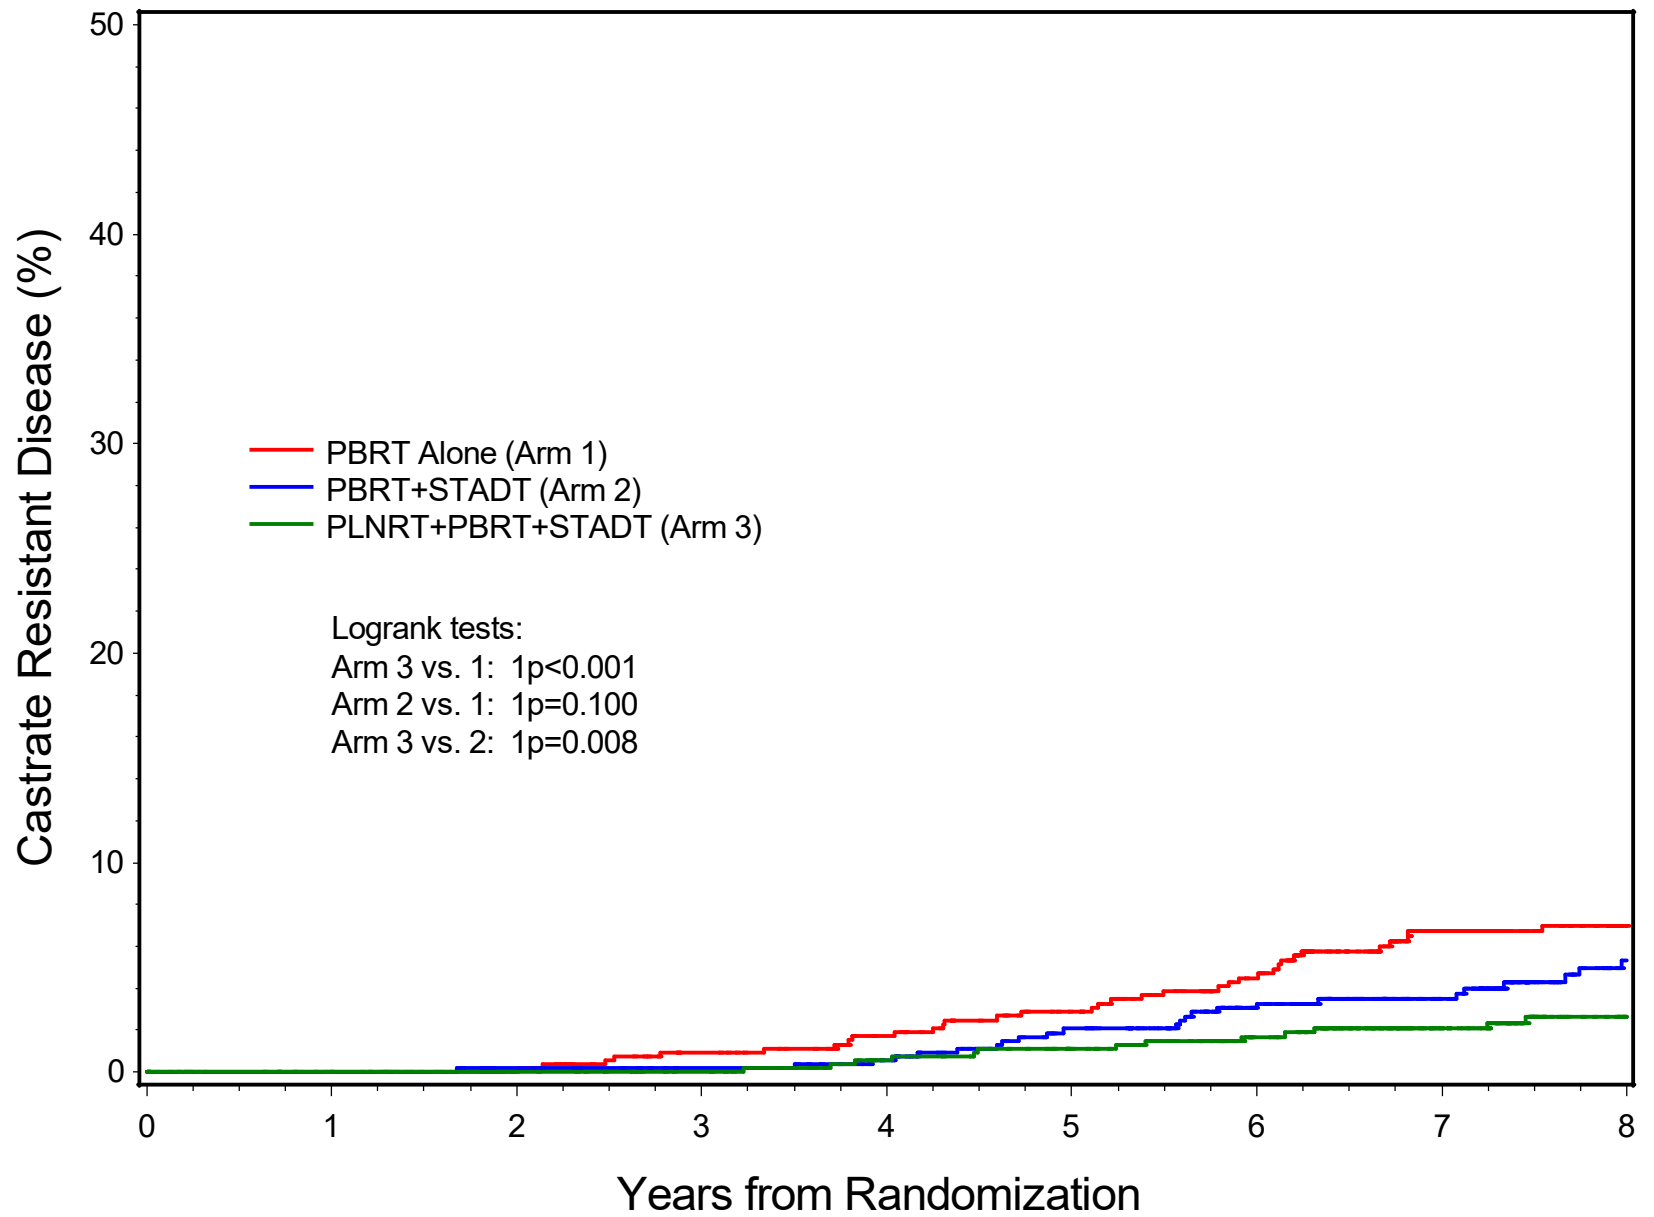

**No. at Risk**

|                  |     |     |     |     |     |     |     |     |     |
|------------------|-----|-----|-----|-----|-----|-----|-----|-----|-----|
| PBRT Alone       | 564 | 540 | 529 | 512 | 490 | 466 | 430 | 346 | 274 |
| PBRT+STADT       | 578 | 558 | 547 | 537 | 520 | 492 | 432 | 350 | 252 |
| PLNRT+PBRT+STADT | 574 | 561 | 552 | 543 | 525 | 507 | 449 | 366 | 286 |

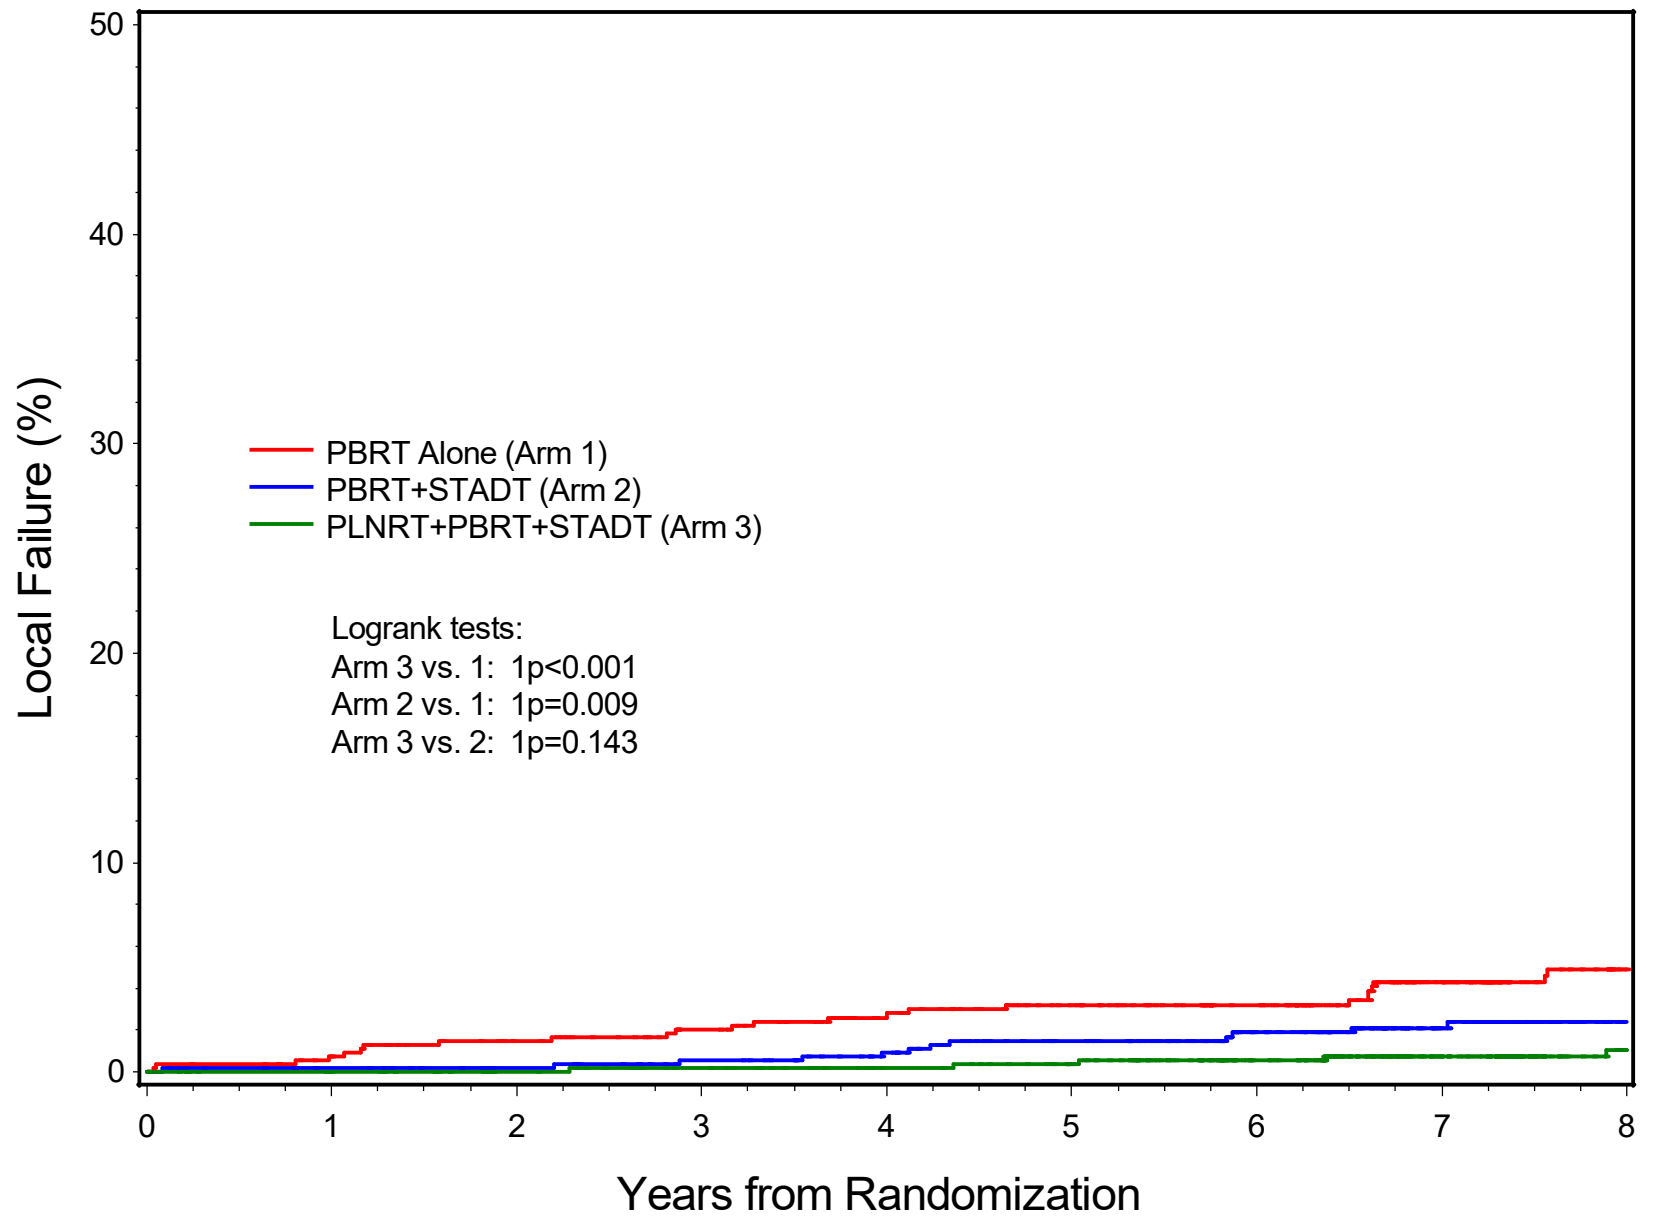

**No. at Risk**

|                  |     |     |     |     |     |     |     |     |     |
|------------------|-----|-----|-----|-----|-----|-----|-----|-----|-----|
| PBRT Alone       | 564 | 536 | 521 | 505 | 481 | 456 | 426 | 348 | 274 |
| PBRT+STADT       | 578 | 557 | 547 | 535 | 518 | 493 | 436 | 353 | 261 |
| PLNRT+PBRT+STADT | 574 | 561 | 552 | 542 | 526 | 510 | 453 | 366 | 285 |

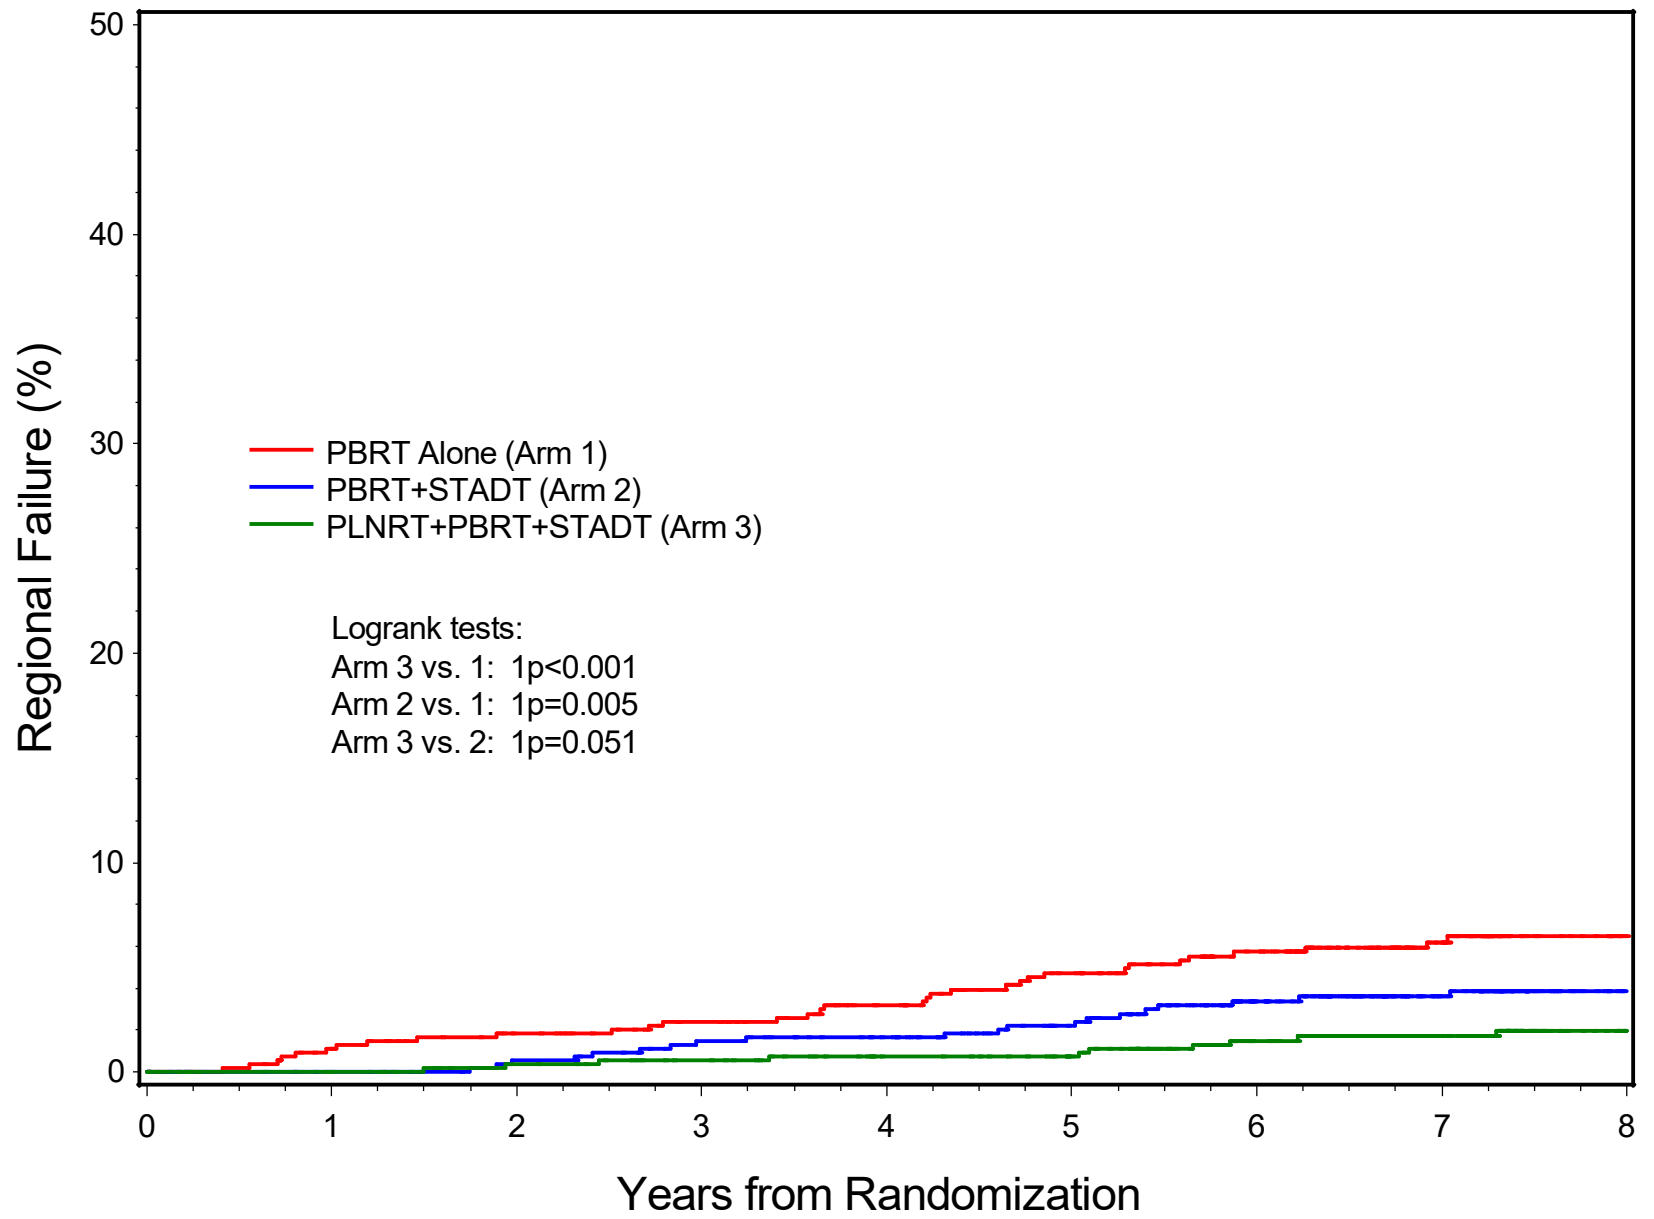

**No. at Risk**

|                  |     |     |     |     |     |     |     |     |     |
|------------------|-----|-----|-----|-----|-----|-----|-----|-----|-----|
| PBRT Alone       | 564 | 534 | 519 | 503 | 480 | 453 | 420 | 345 | 274 |
| PBRT+STADT       | 578 | 558 | 545 | 530 | 516 | 490 | 432 | 351 | 259 |
| PLNRT+PBRT+STADT | 574 | 561 | 550 | 540 | 523 | 508 | 451 | 366 | 287 |

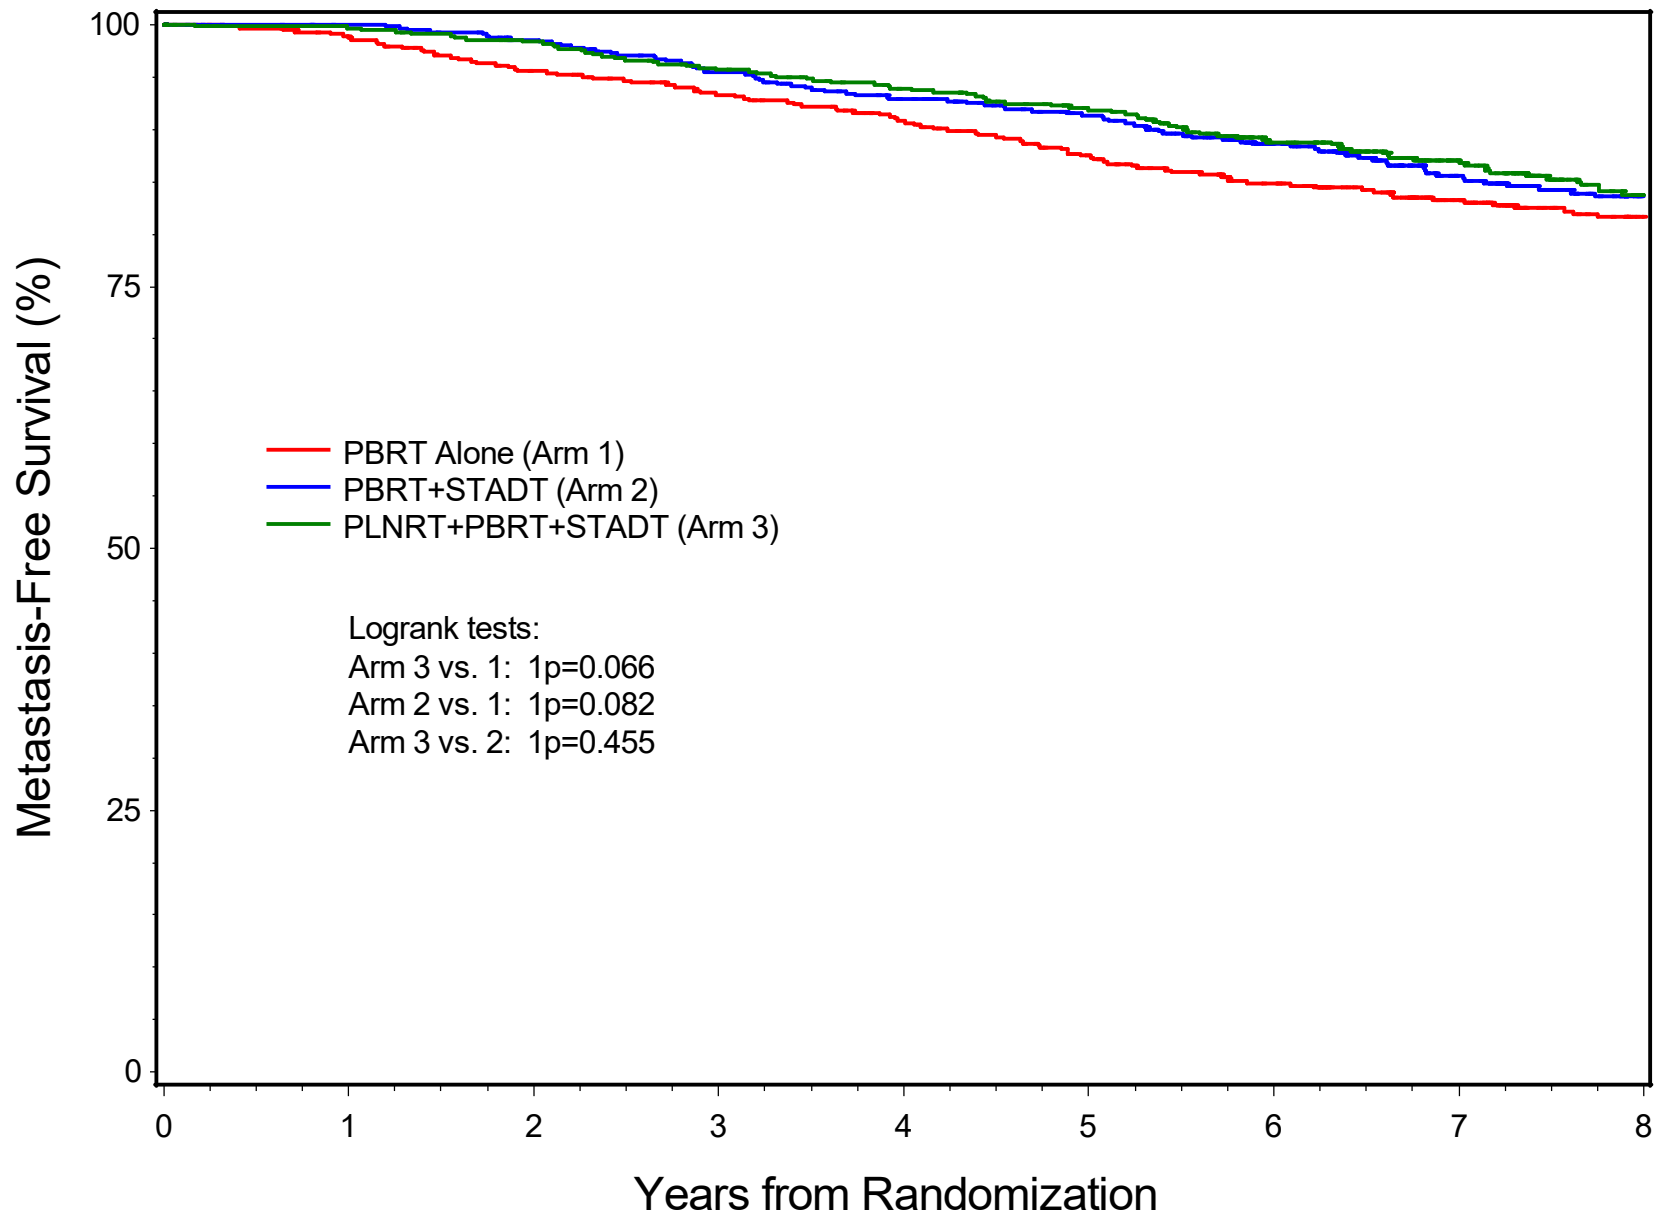

**No. at Risk**

|                  |     |     |     |     |     |     |     |     |     |
|------------------|-----|-----|-----|-----|-----|-----|-----|-----|-----|
| PBRT Alone       | 564 | 535 | 513 | 494 | 470 | 441 | 404 | 337 | 268 |
| PBRT+STADT       | 578 | 558 | 543 | 521 | 498 | 474 | 415 | 335 | 244 |
| PLNRT+PBRT+STADT | 574 | 561 | 550 | 531 | 513 | 491 | 436 | 354 | 275 |

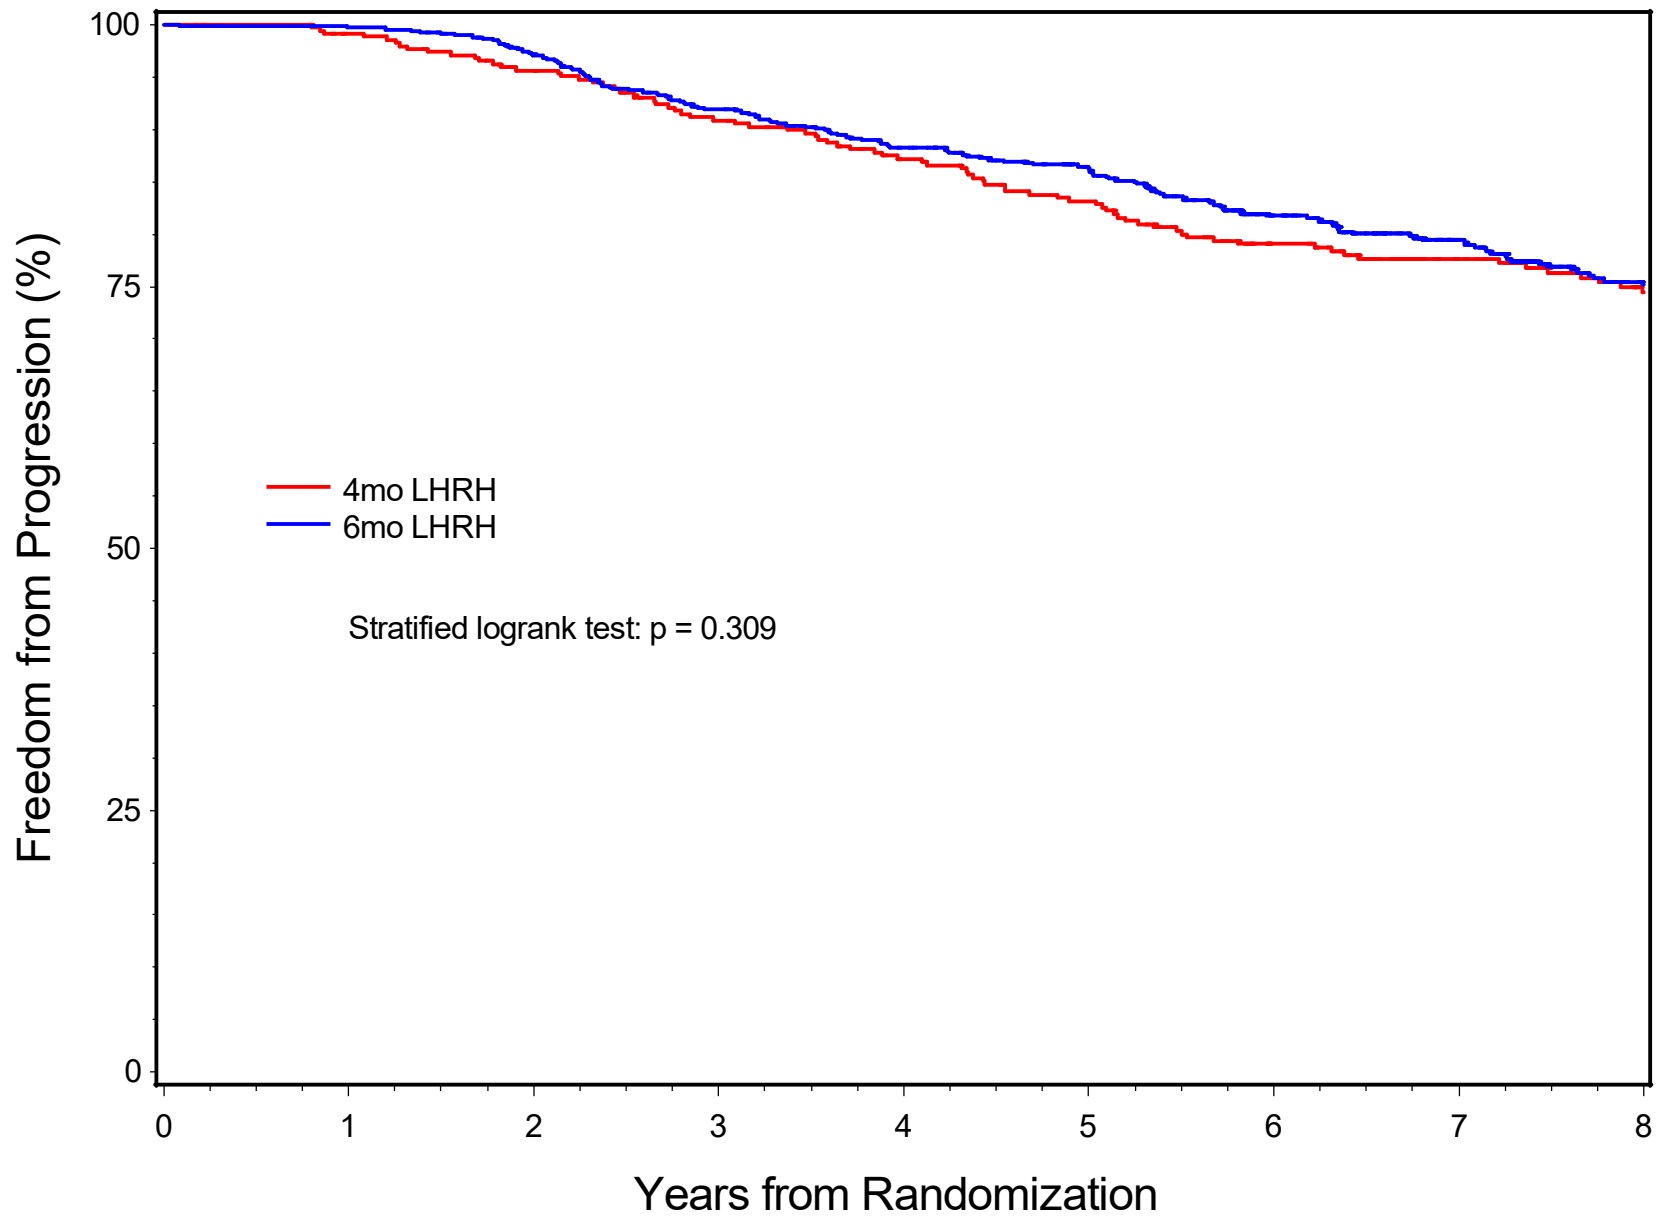

**No. at Risk**

|          |     |     |     |     |     |     |     |     |     |
|----------|-----|-----|-----|-----|-----|-----|-----|-----|-----|
| 4mo LHRH | 350 | 342 | 324 | 302 | 282 | 266 | 232 | 187 | 151 |
| 6mo LHRH | 680 | 676 | 647 | 605 | 566 | 525 | 449 | 364 | 259 |

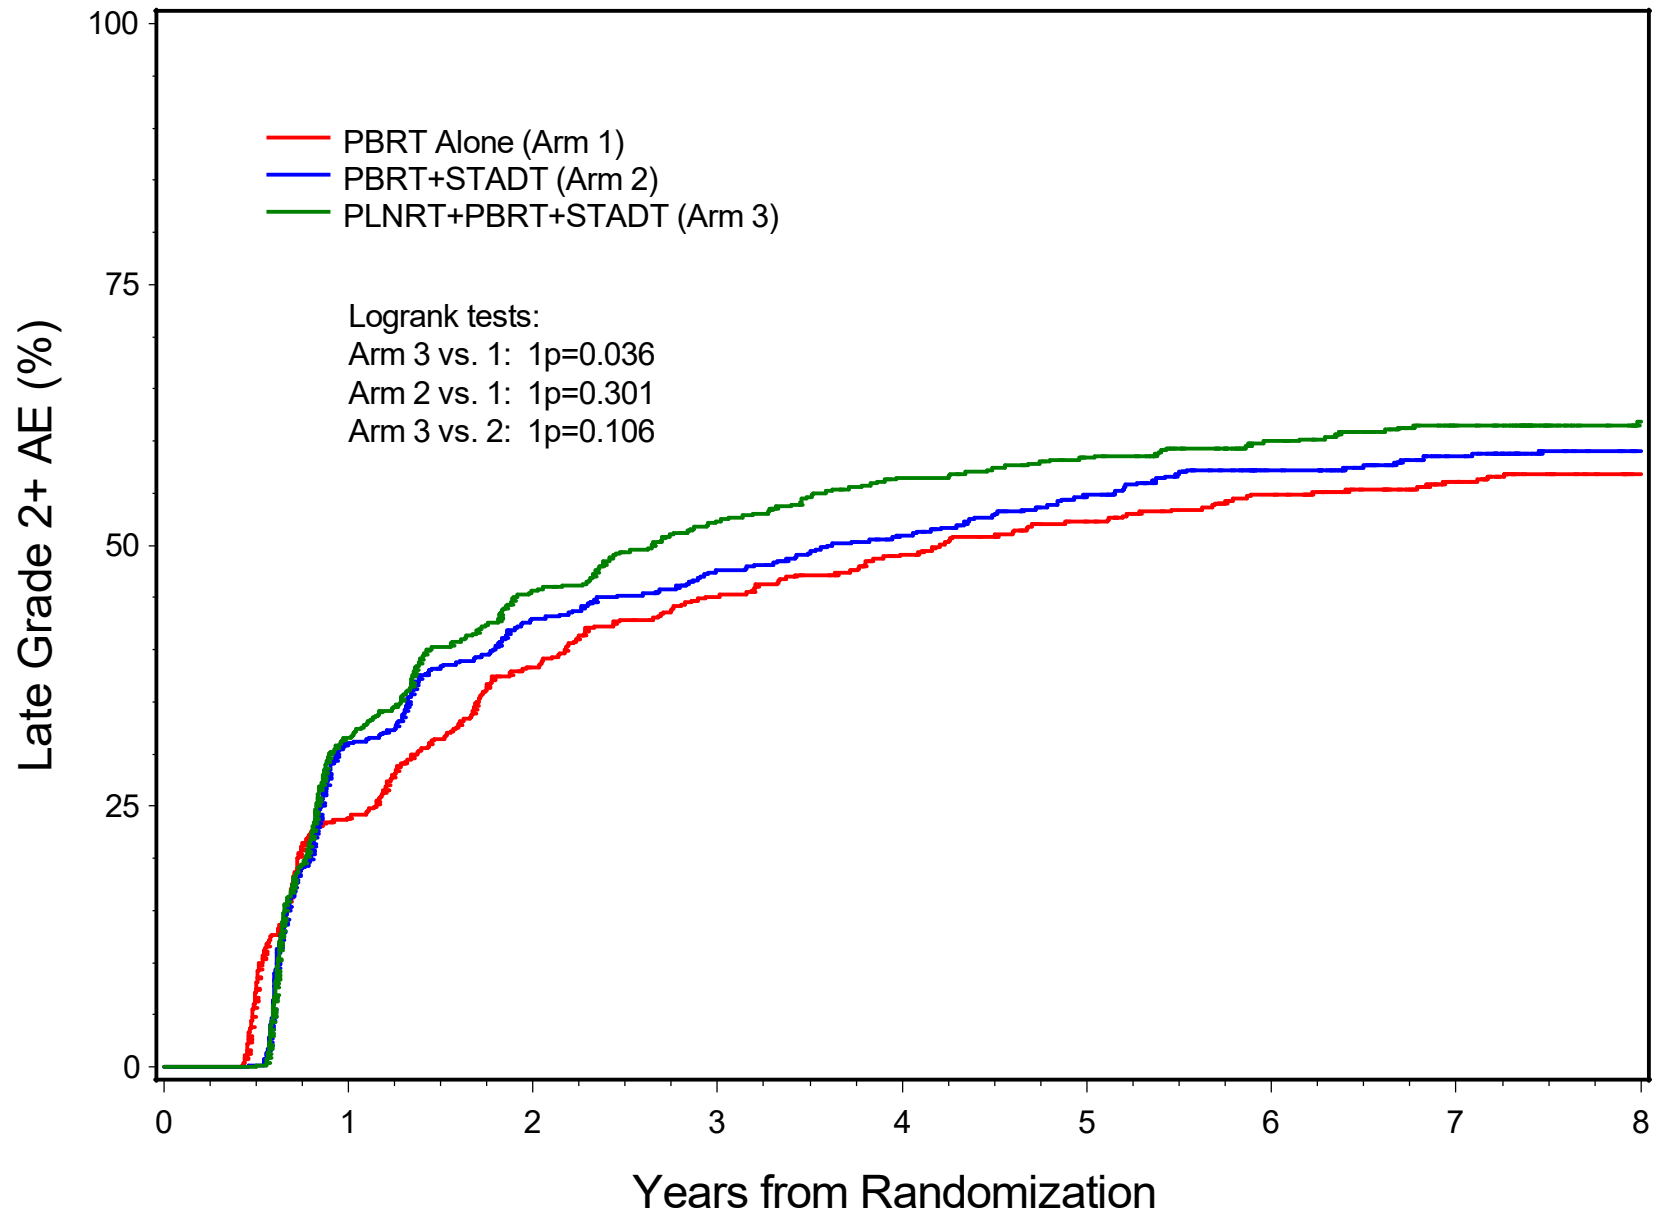

**No. at Risk**

|                  |     |     |     |     |     |     |     |     |     |
|------------------|-----|-----|-----|-----|-----|-----|-----|-----|-----|
| PBRT Alone       | 545 | 410 | 325 | 282 | 250 | 224 | 200 | 157 | 126 |
| PBRT+STADT       | 559 | 383 | 309 | 278 | 250 | 217 | 176 | 136 | 101 |
| PLNRT+PBRT+STADT | 562 | 384 | 300 | 256 | 228 | 211 | 178 | 134 | 102 |

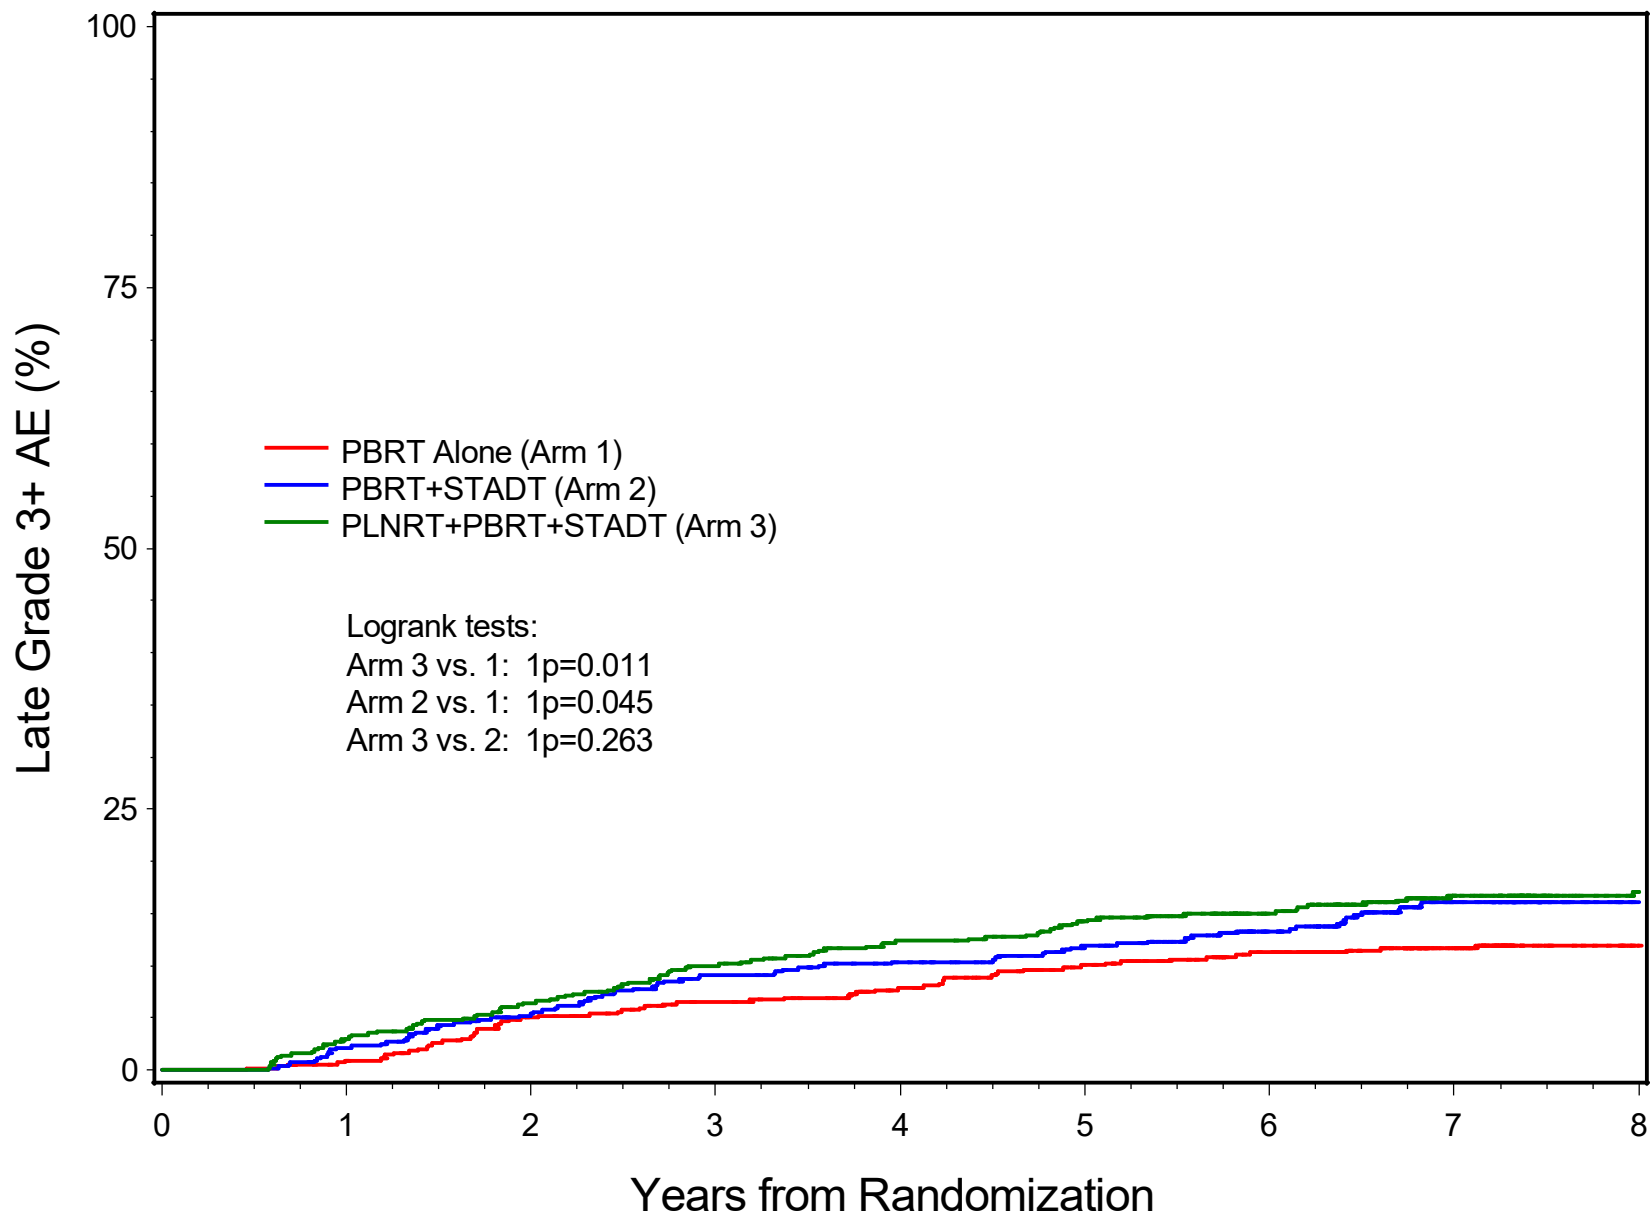

**No. at Risk**

|                  |     |     |     |     |     |     |     |     |     |
|------------------|-----|-----|-----|-----|-----|-----|-----|-----|-----|
| PBRT Alone       | 545 | 532 | 503 | 482 | 456 | 426 | 392 | 321 | 256 |
| PBRT+STADT       | 559 | 543 | 515 | 486 | 465 | 439 | 386 | 304 | 228 |
| PLNRT+PBRT+STADT | 562 | 543 | 517 | 490 | 463 | 439 | 383 | 299 | 233 |
